# Supplementary material for: Interactome Mapping of eIF3A in a Colon Cancer and an Immortalized Embryonic Cell Line Using Proximity-Dependent Biotin Identification
Source: MDPI journal article supplement (doi:10.3390/cancers13061293), 2021-03-14

**Interactome mapping of eIF3A in a colon cancer and an immortalized embryonic cell line using proximity-dependent biotin identification**

Diep-Khanh Vo, Alexander Engler, Darko Stoimenovski, Roland Hartig, Thilo Kaehne, Thomas Kalinski, Michael Naumann, Johannes Haybaeck and Norbert Nass

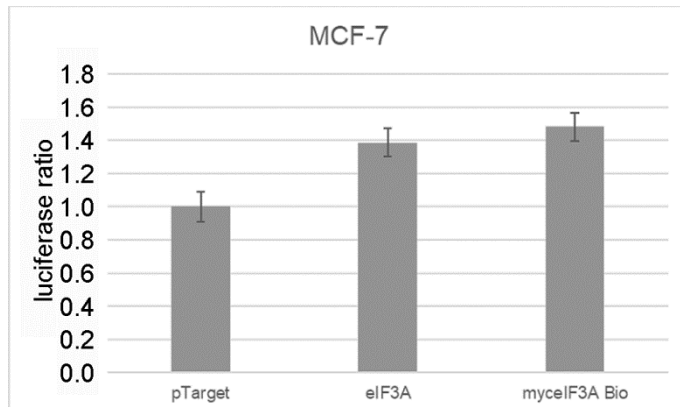

**Figure S1:** Effect of eIF3A and myc-BirA\*-eIF3A over-expression on the polio-IRES to cap mediated translation ratio. The fusion protein acts similar as the native eIF3A, holding for a functional integration into the initiation complex. MCF-7 cells were transfected with a control vector (pTarget) and pTarget-based over expression vectors for native eIF3A and the birA-eIF3A fusion protein. Average of the luciferase ratio and standard deviation is shown. The differences to the empty-vector-control are significant with  $p < 0.01$ .

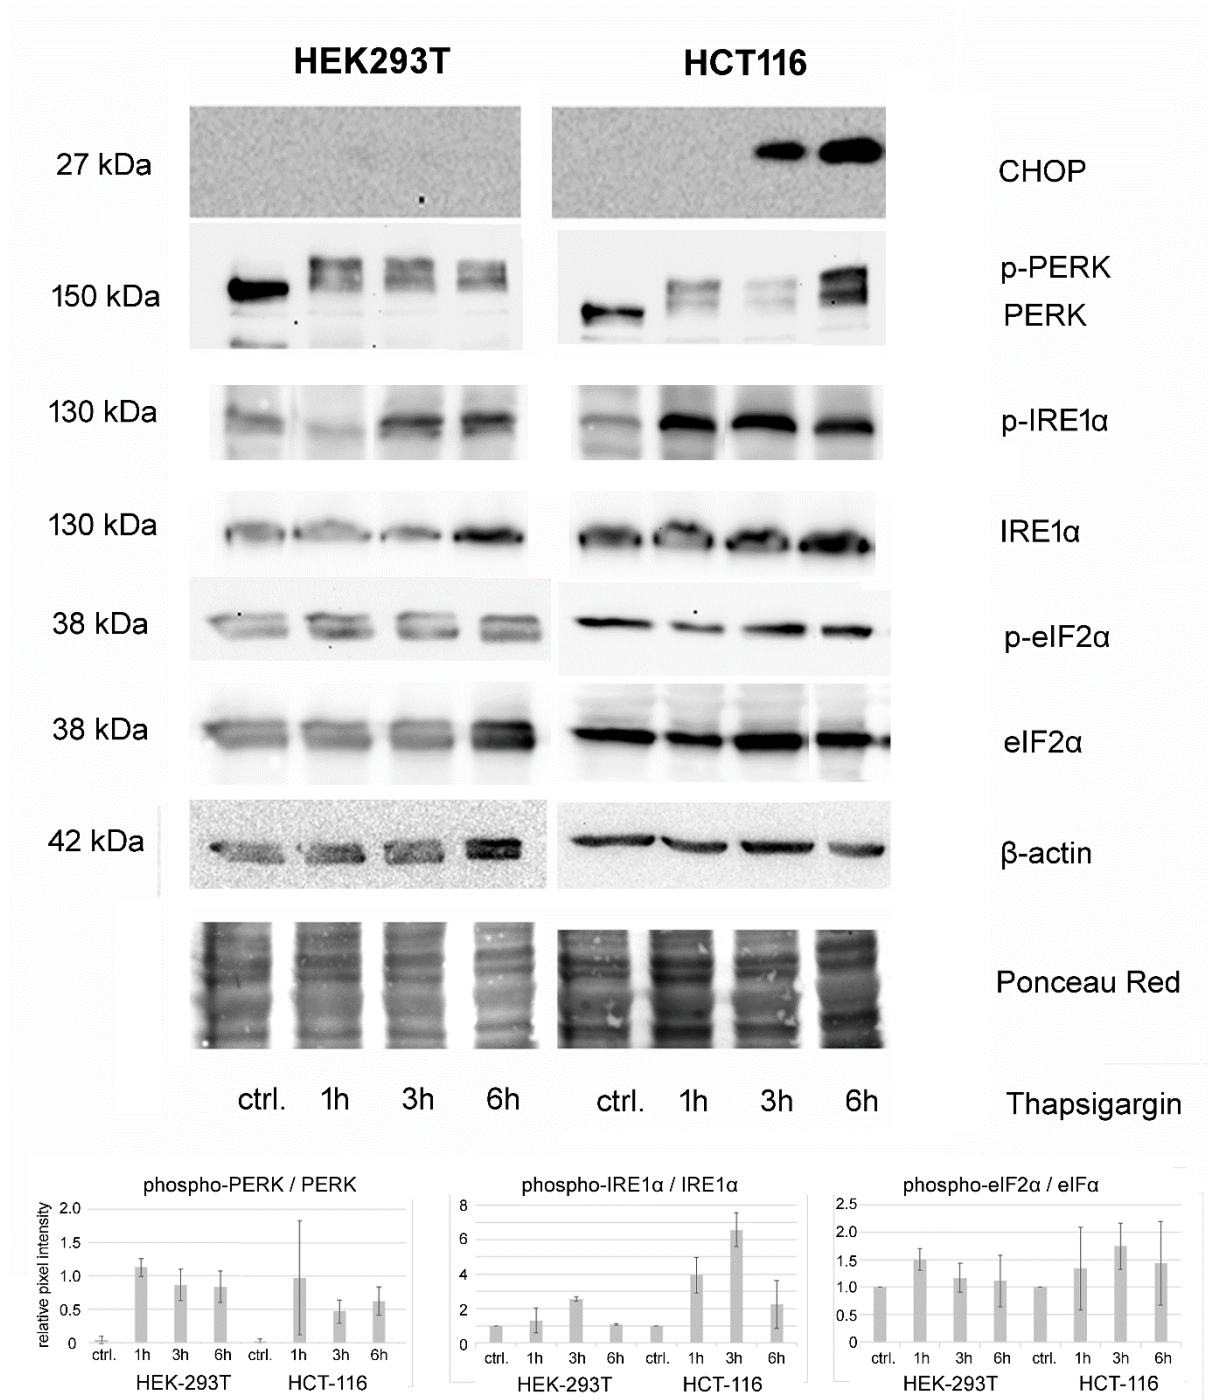

**Figure S2:** Signalling in HCT-116 and HEK-293-T cells upon incubation with thapsigargin. Cells were incubated with thapsigargin for the indicated time and proteins extracted and subjected to Western blotting as described in materials and methods (Vo et al 2019). Pixel intensity of the lanes was quantified using ImageJ and the results are shown in the lower panel.

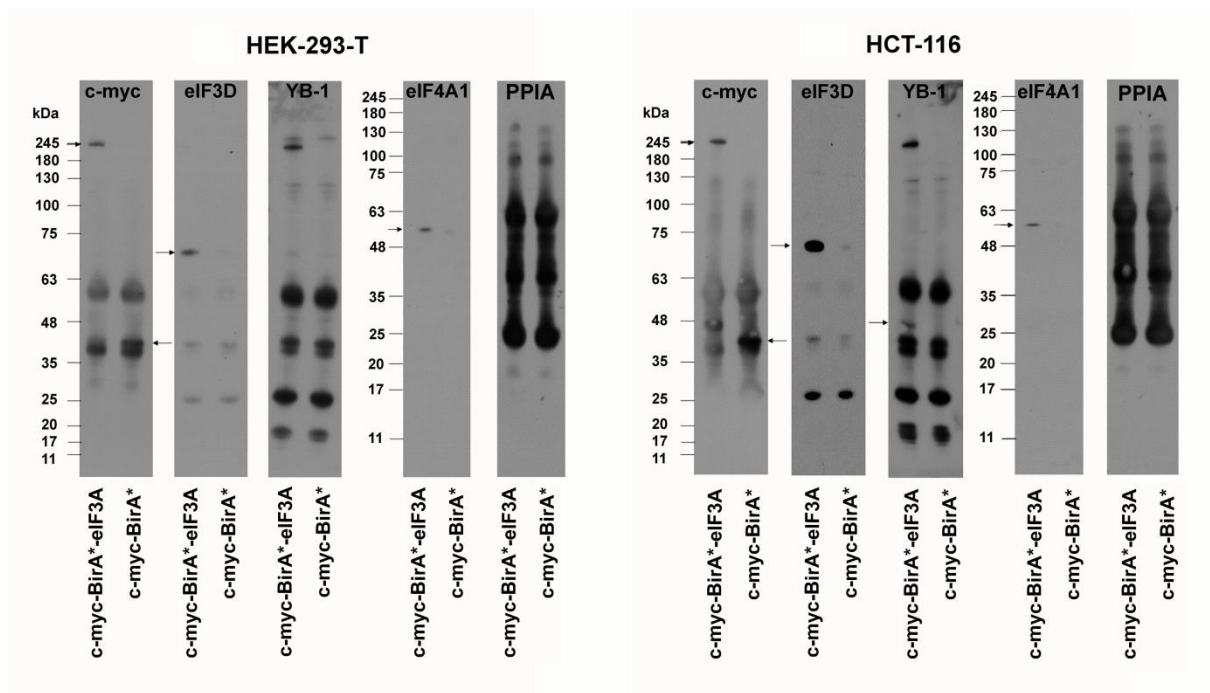

**Figure S3:** Co-immunoprecipitation assay. Western blot of the immunoprecipitated proteins probed for c-myc, eIF3D, eIF4A1, YB-1 and PPIA. Antibodies are indicated at the top of the X-ray films. Arrows mark the specific signals.

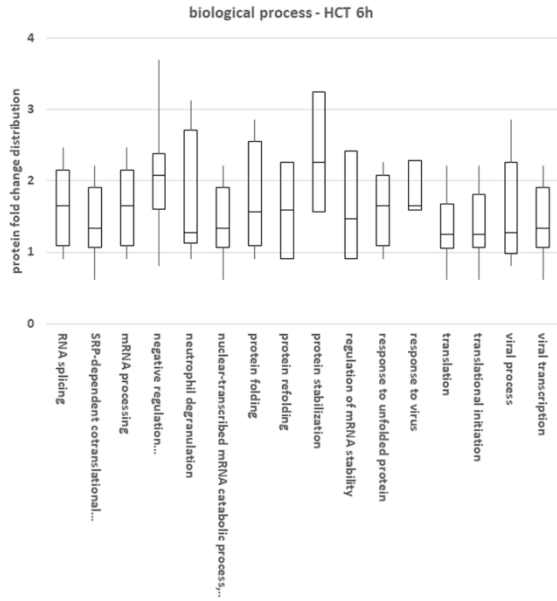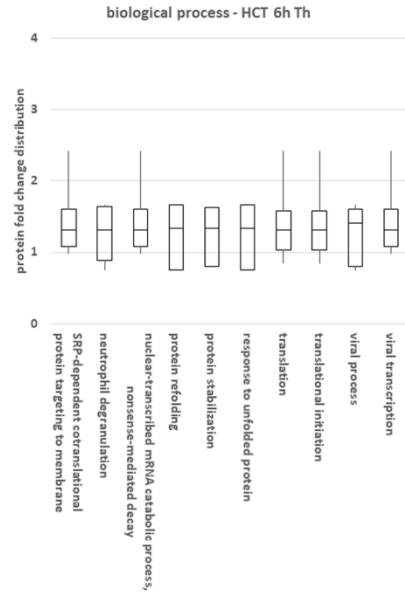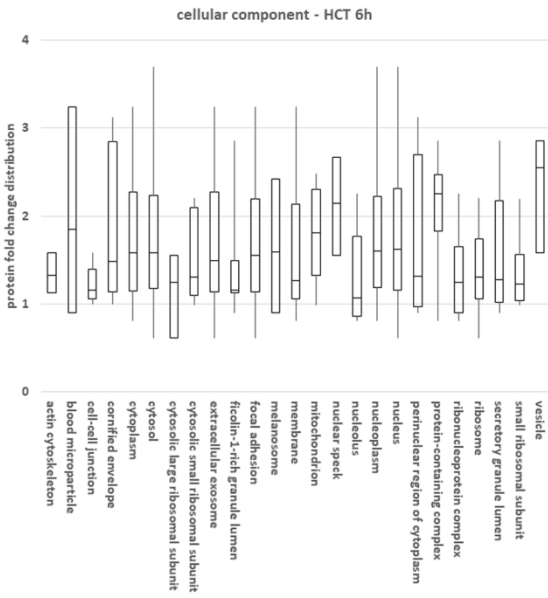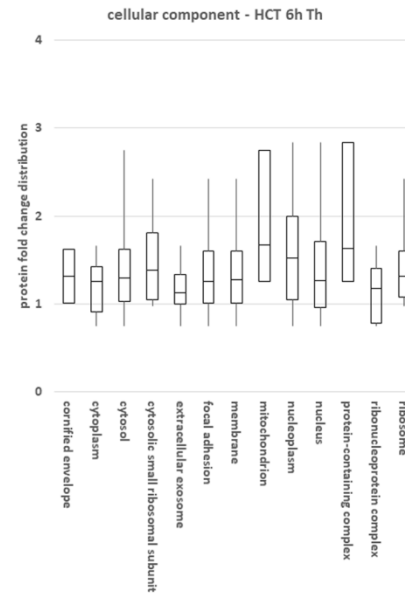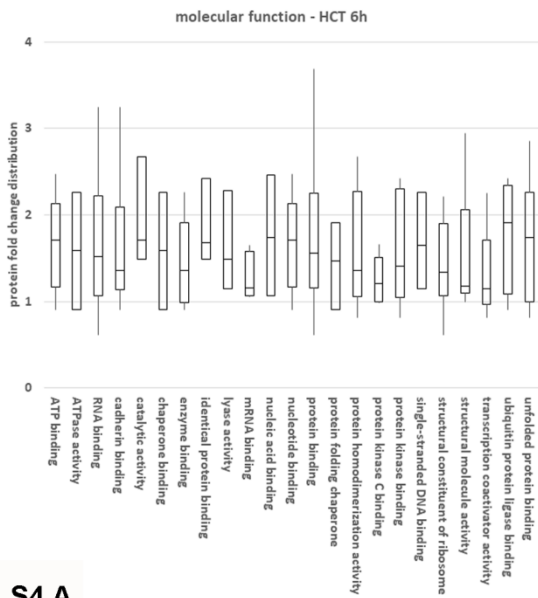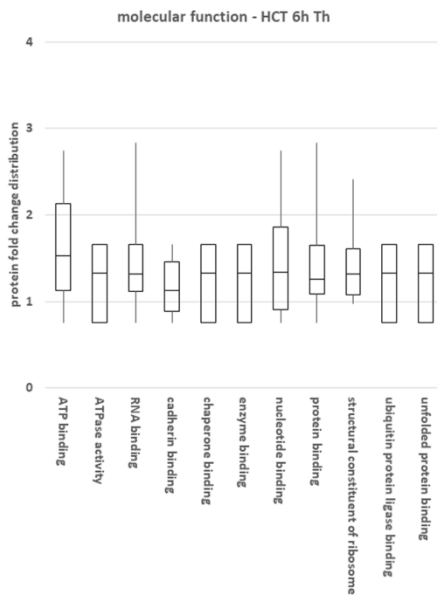

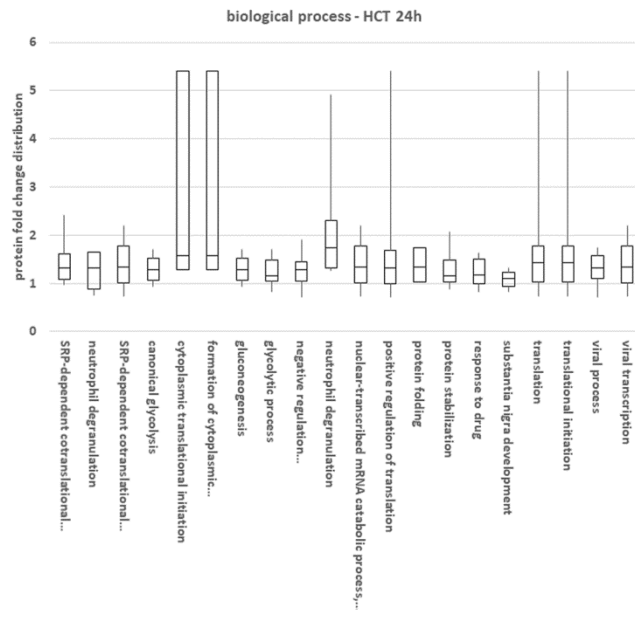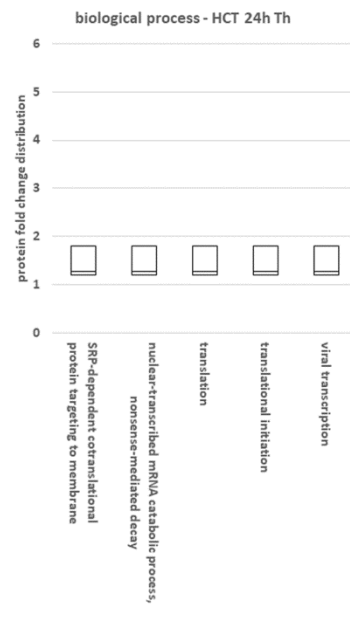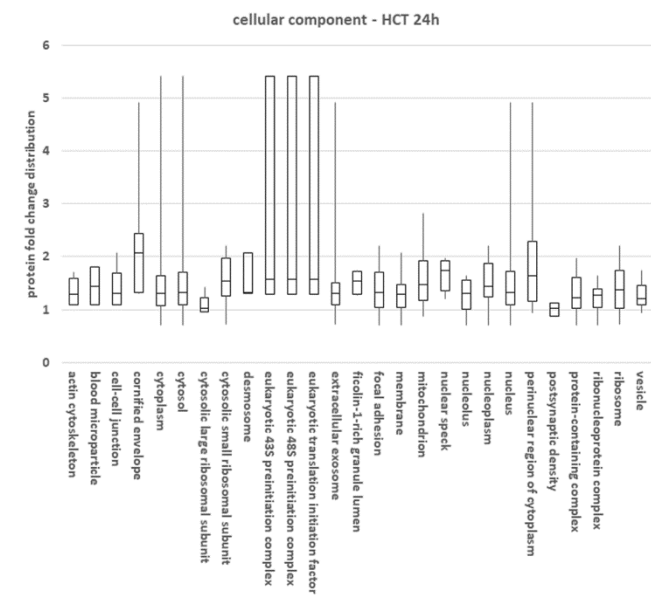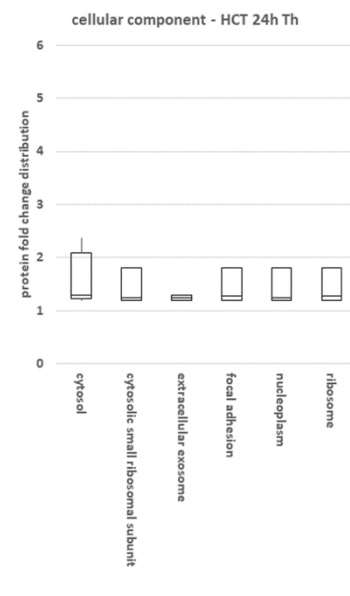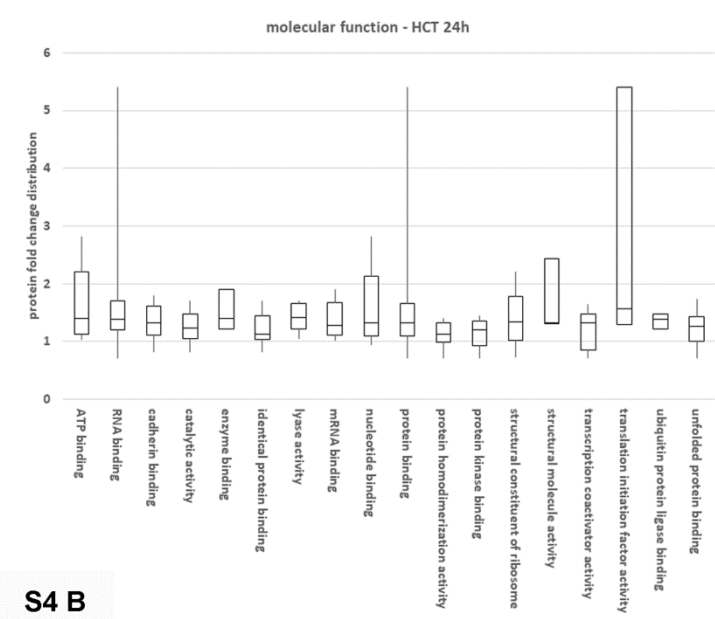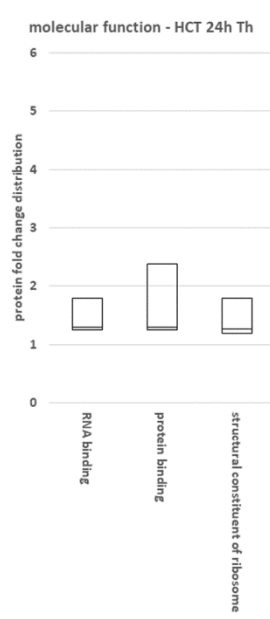

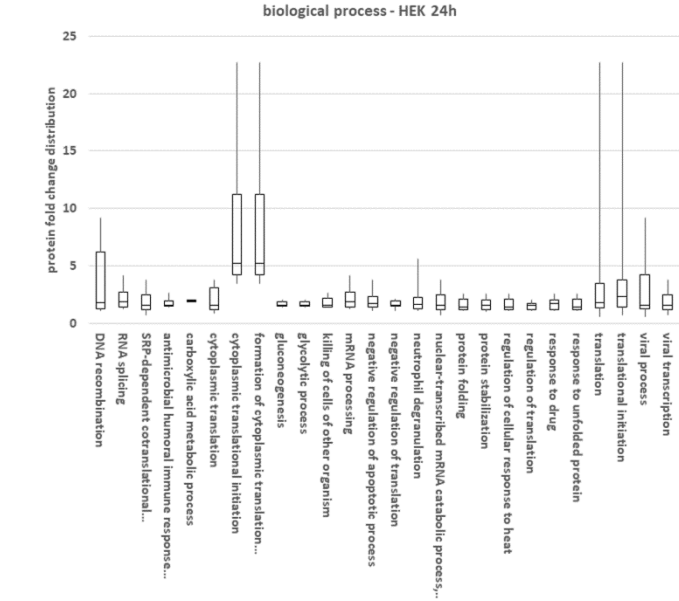

No significant hit for biological process  
HEK 24h

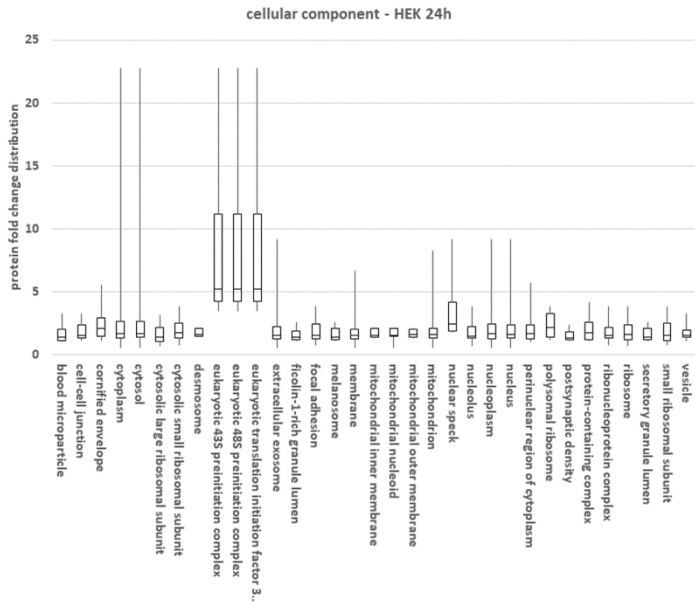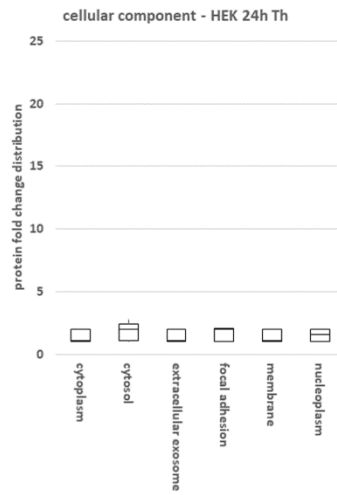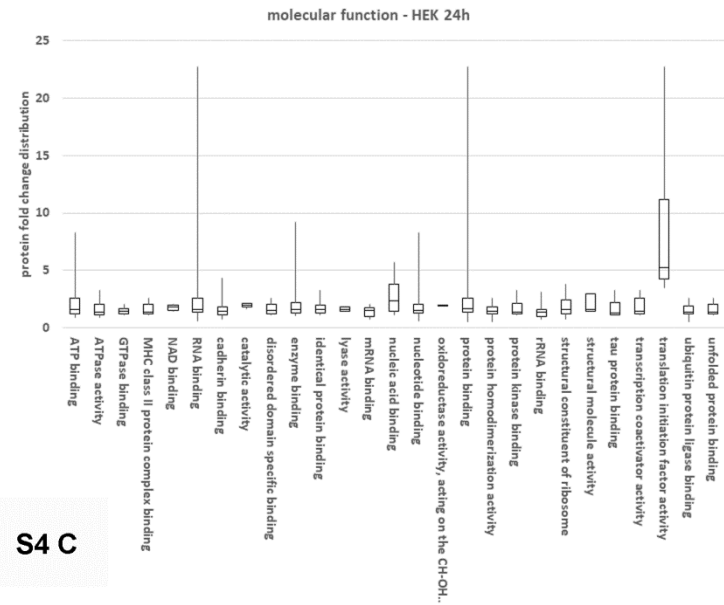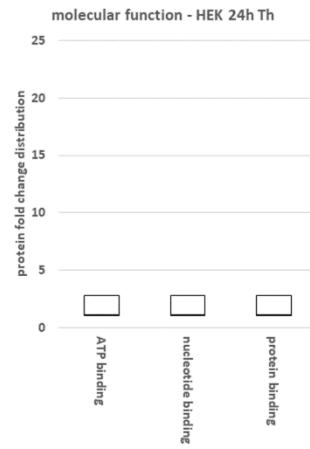

**Figure S4:** GO term enrichment analysis using Genecodis. Mean interaction scores for the significant GO terms are shown as box plots for HCT-116 at 6h (A) and 24h (B) and HEK-293T at 24h (C). Only significant GO terms for cellular component, molecular function and biological process are shown.

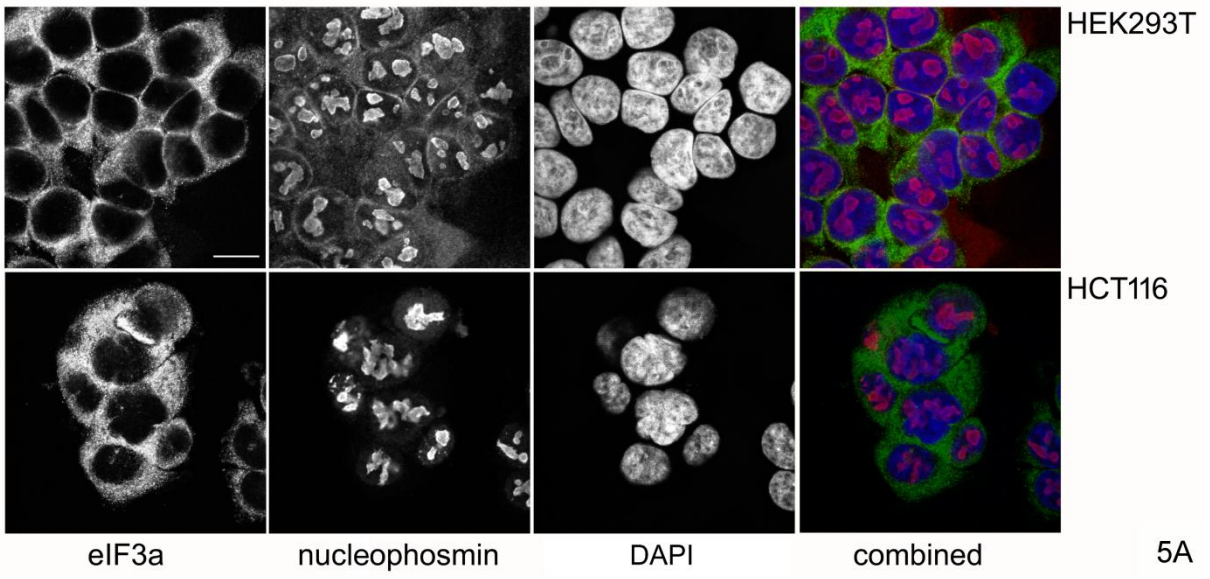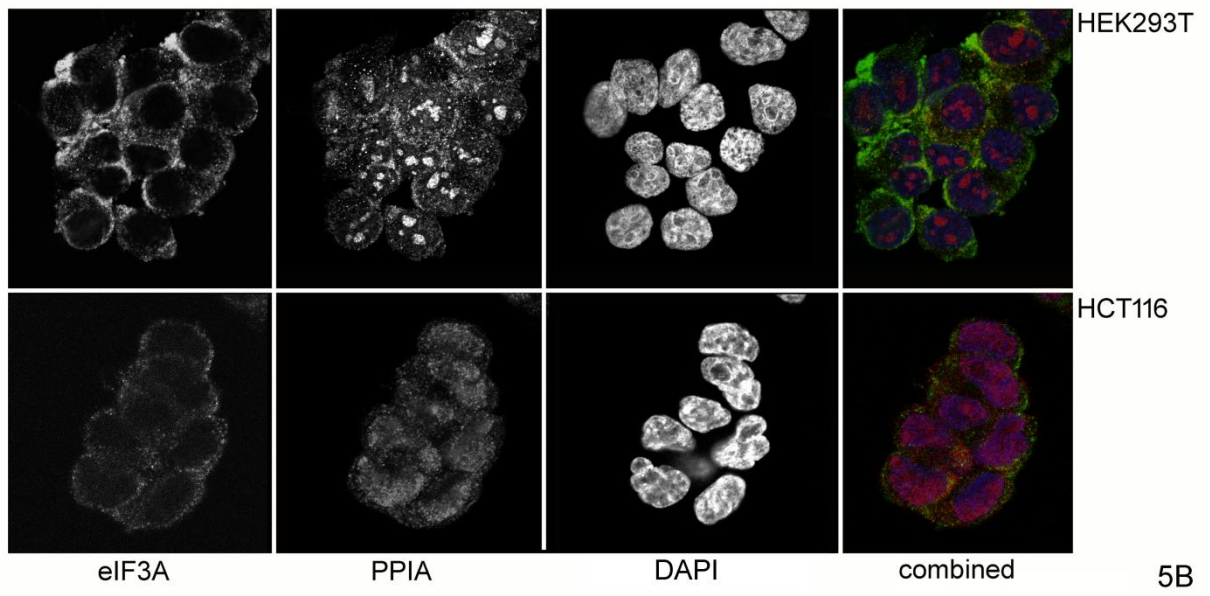

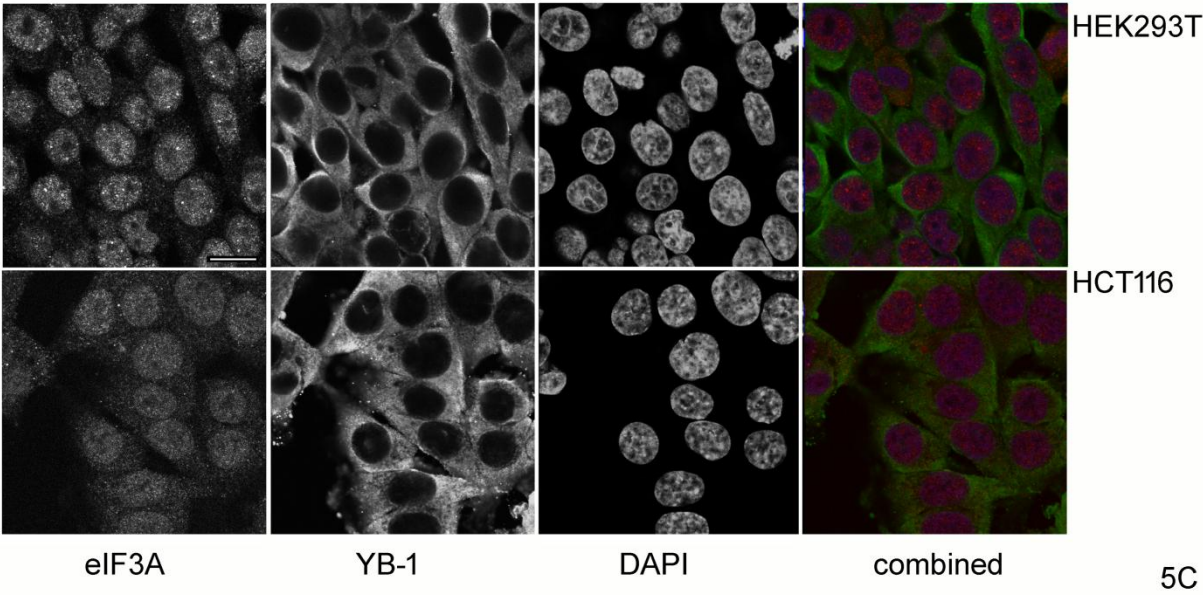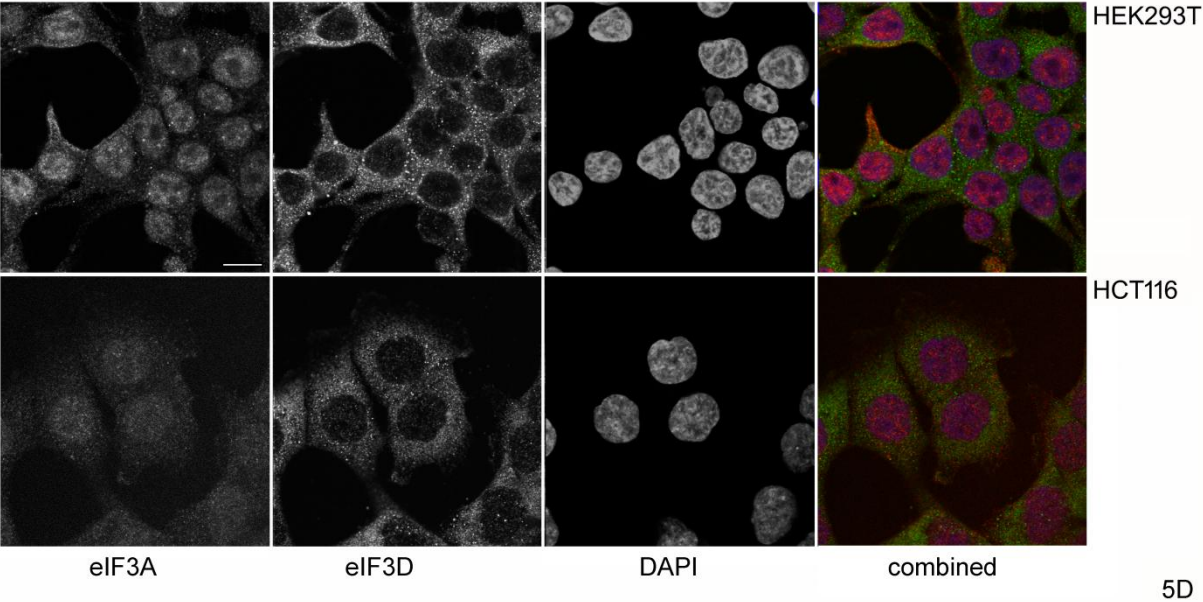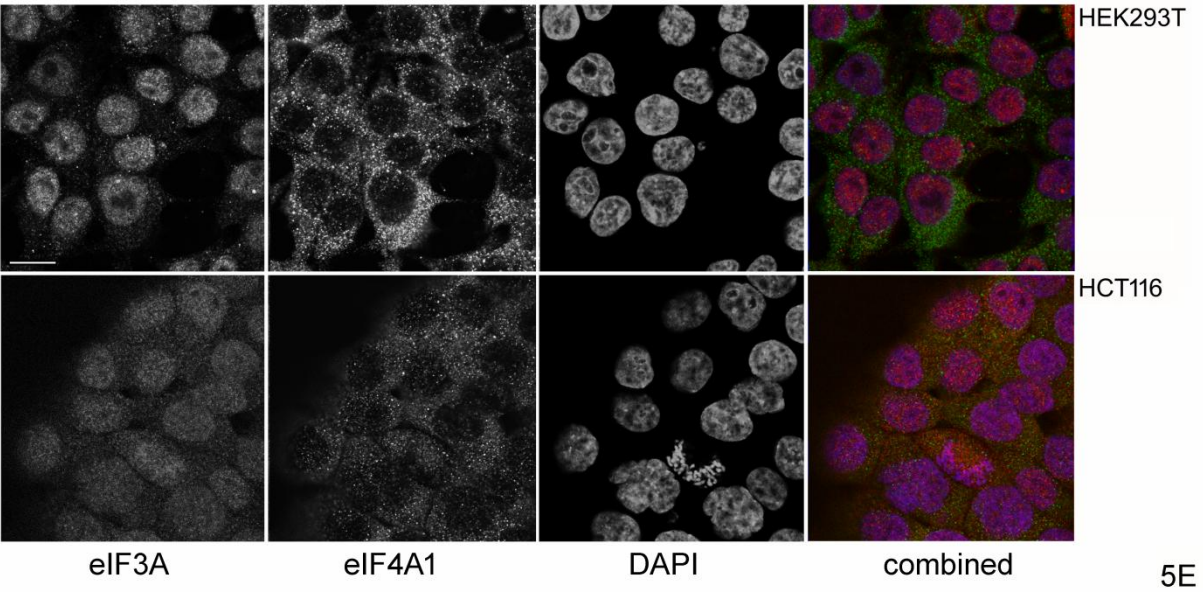

**Figure S5:** Co-localization of eIF3A with nucleophosmin (A), cyclophilin (PPIA, B), YB-1 (C), eIF3D (D) and eIF4A (E) in HCT-116 and HEK-293-T cells under normal growth conditions. Note that in A and B a monoclonal rabbit antibody has been used for eIF3A which was detected with DyLight 488 labelled secondary antibody (green) and the second antigen was detected with monoclonal mouse antibodies using a DyLight 549 labelled secondary antibody (red). In C, D and E, eIF3A was detected with a monoclonal mouse antibody and detected by a DyLight 549 labelled secondary antibody (red) and the second antigen was detected with a rabbit polyclonal serum and DyLight 488 (green). The scale bar represents 50  $\mu$ m.

**Table S1:** Ratio of m<sup>7</sup>G-cap to Polio-IRES dependent translation. Cells were transfected with a vector encoding *Renilla* luciferase and *Photinus* luciferase on one transcript separated by the Polio- IRES sequence (pcDNA3-RLUC-POLIRES-FLUC). A dual luciferase assay was performed and the ratio of *Photinus* to *Renilla* luciferase determined. For better comparison of the three independent experiments with 8 replicas each, the data for the HEK-293T cell-line in individual experiments was set to 1. Geometric average +/- standard error are shown. Significance was calculated by one way ANOVA.

| Cell-line                                                       | HEK-293T      | HCT-116       | Significance |
|-----------------------------------------------------------------|---------------|---------------|--------------|
| <i>Photinus</i> (IRES) to <i>Renilla</i> (cap) luciferase ratio | 1.00 +/- 0.01 | 1.12 +/- 0.03 | P= 0.04      |

Uncropped blots included in Figure 1: Biotin.

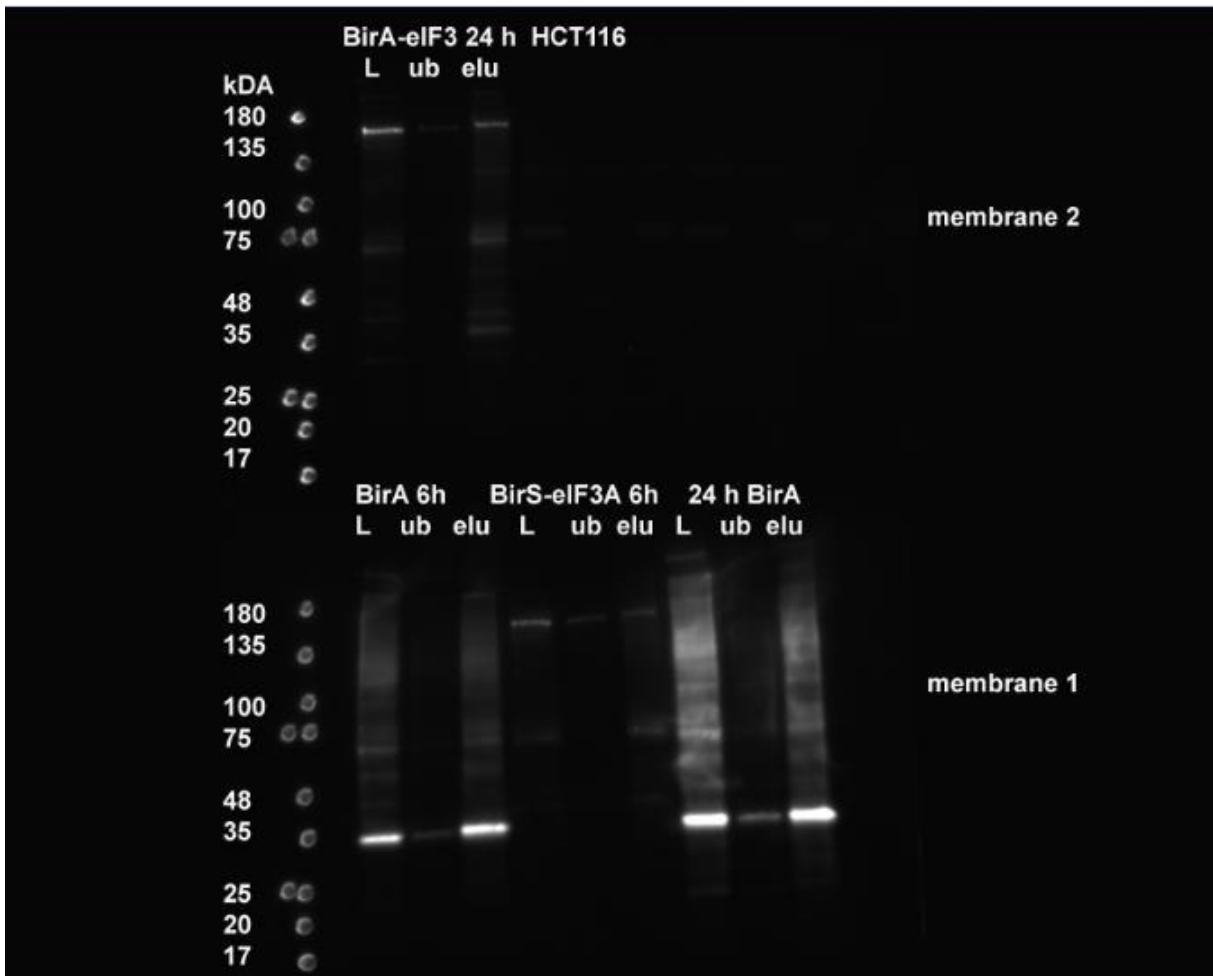

Original information of Figure 1: eIF3A.

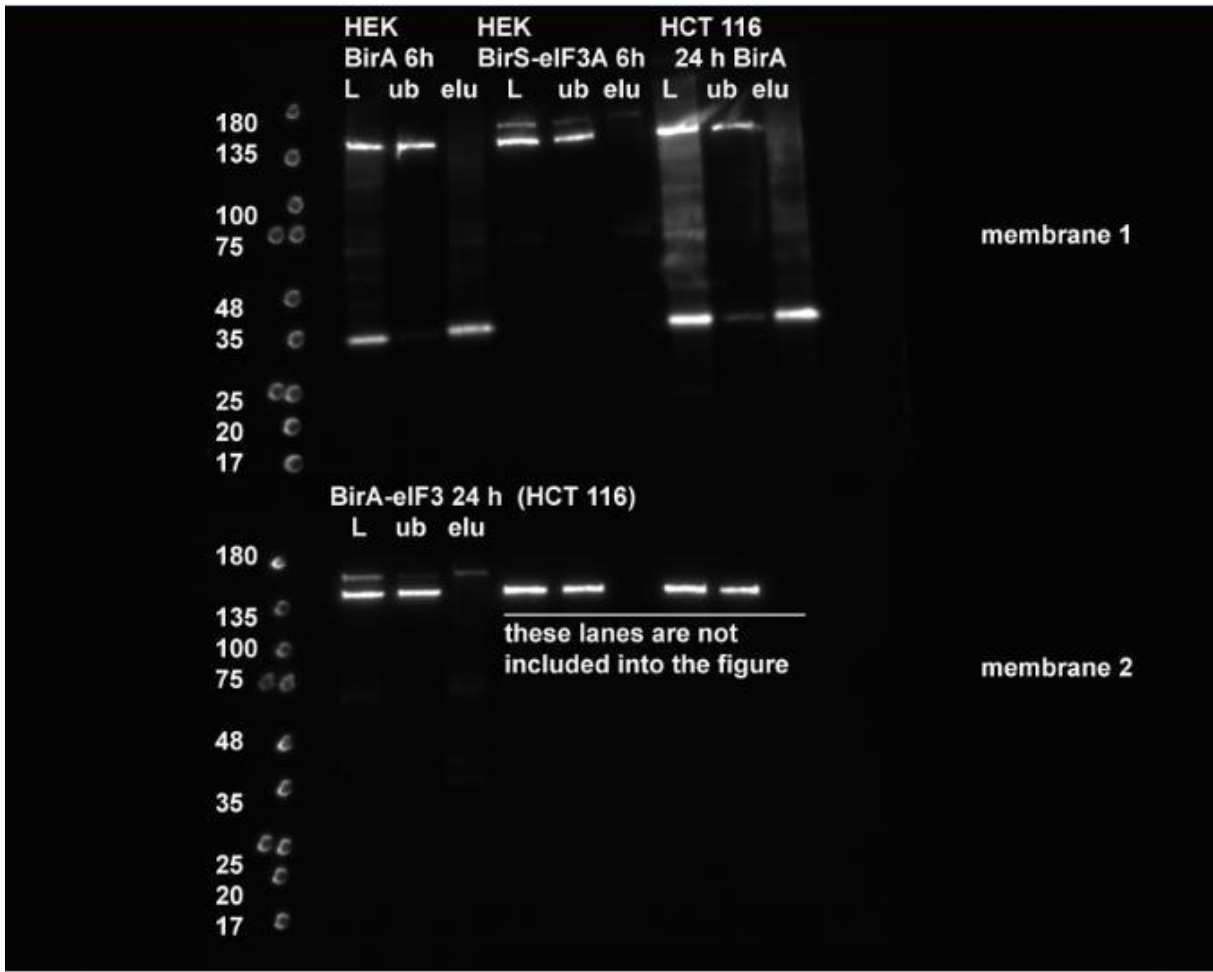

Uncropped blots for Fig.S1: Ponceau Red exp1

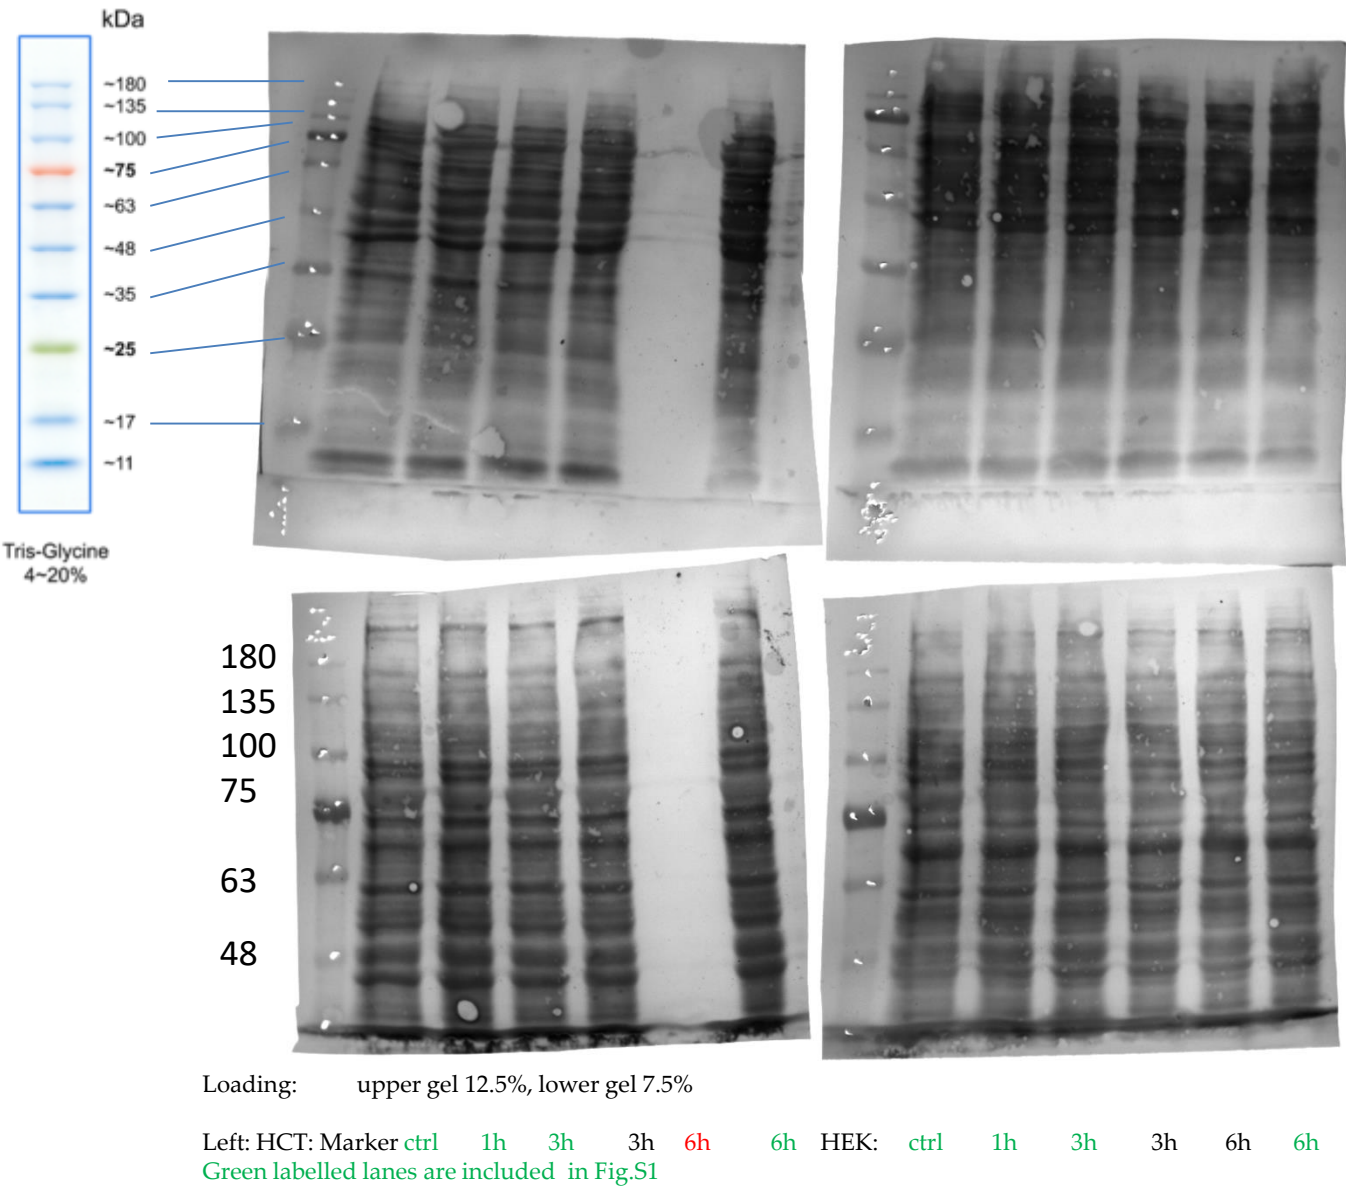

Uncropped blots for Fig.S1 P-eIF2alpha Exp 1: 12.5% gel

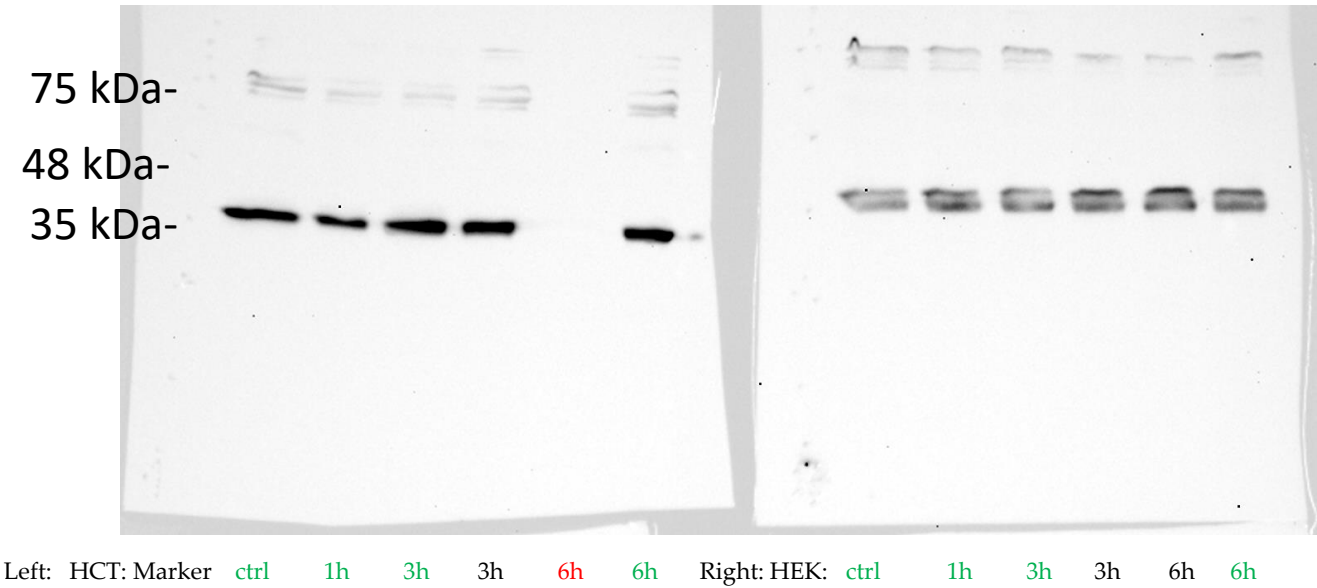

Uncropped blots for Fig.S1: eIF2alpha Exp 1 12.5 % gel:

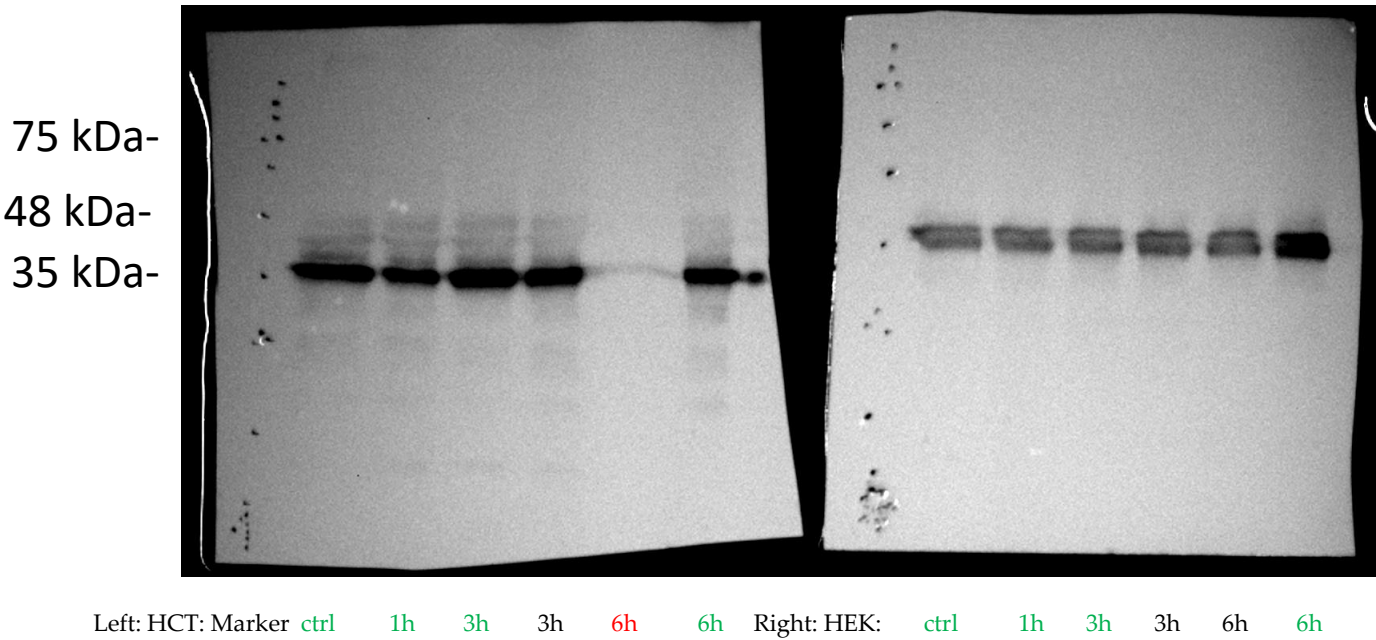

Uncropped blots for Fig.S1: PERK exp 1, 7.5% gel

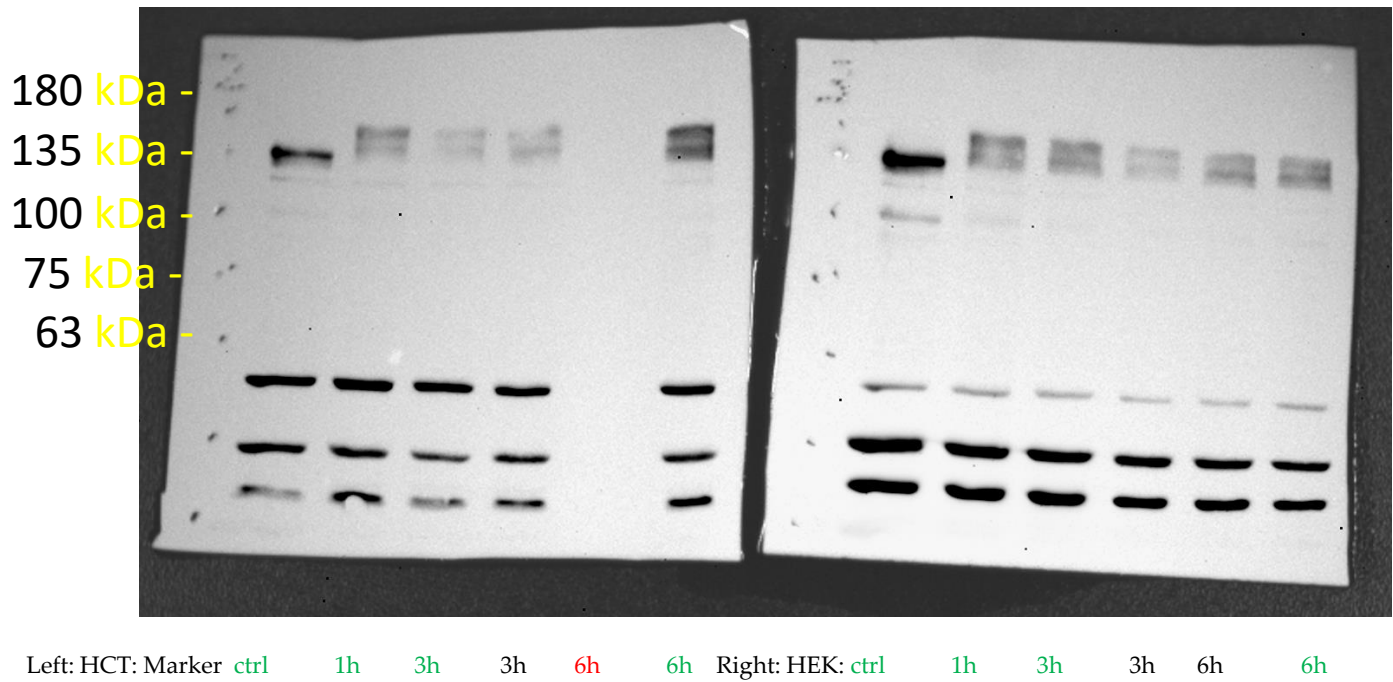

Uncropped blots for Fig.S1:  $\beta$ -actin Exp 1, 12.5% gel

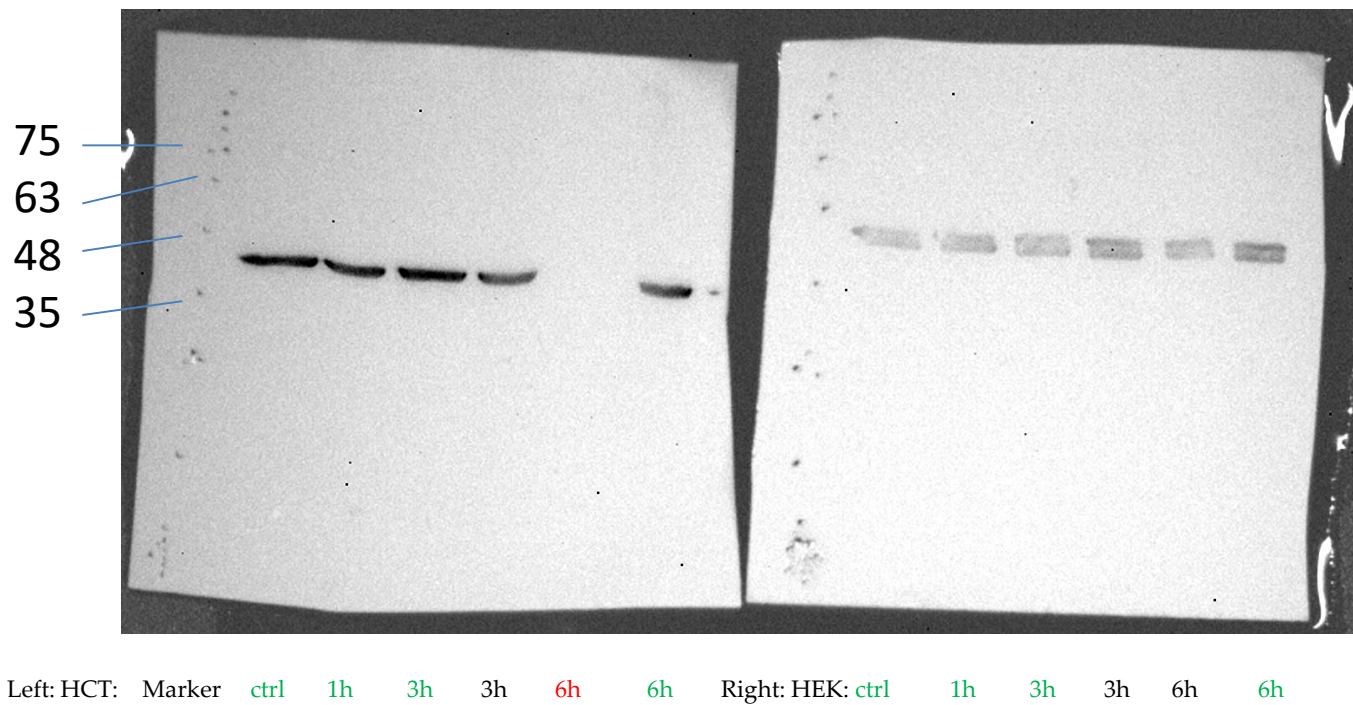

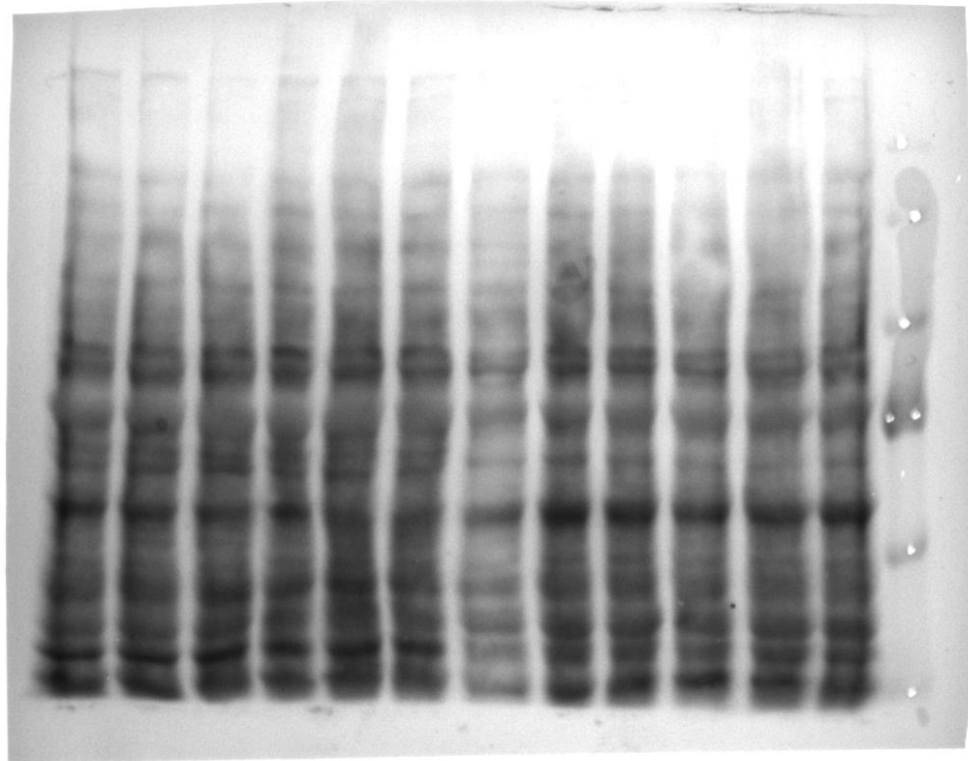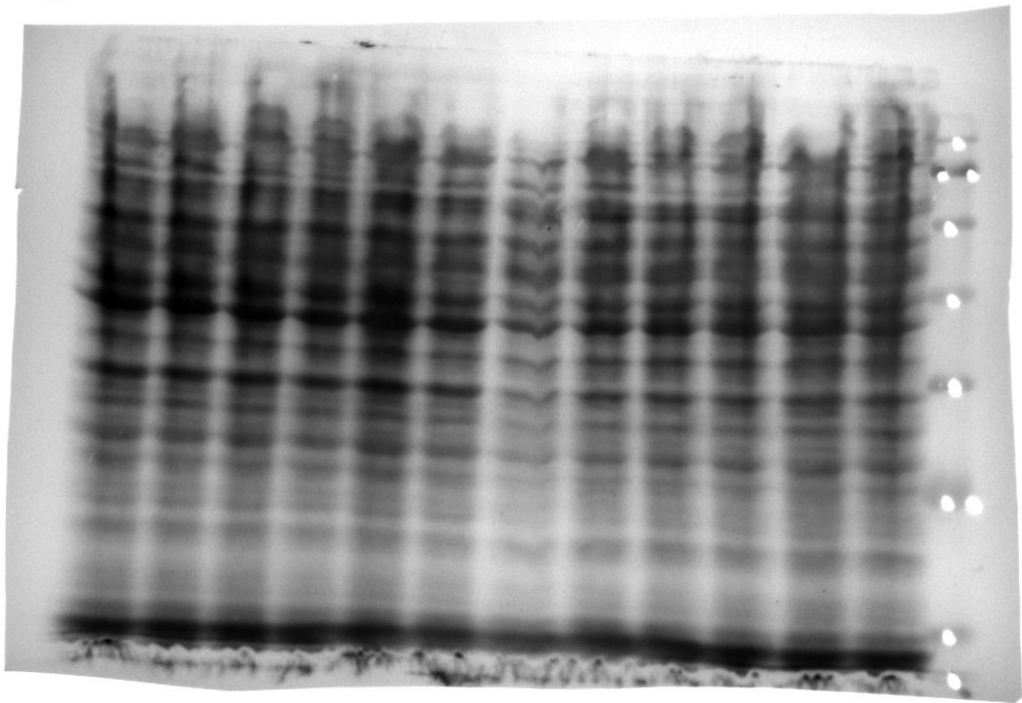

HCT116 HEK293T  
6h 6h 3h 3h 1h ctrl 6h 6h 3h 3h 1h ctrl Marker

Uncropped blot for Fig. S1: CHOP, exp 2, 12.5 % gel

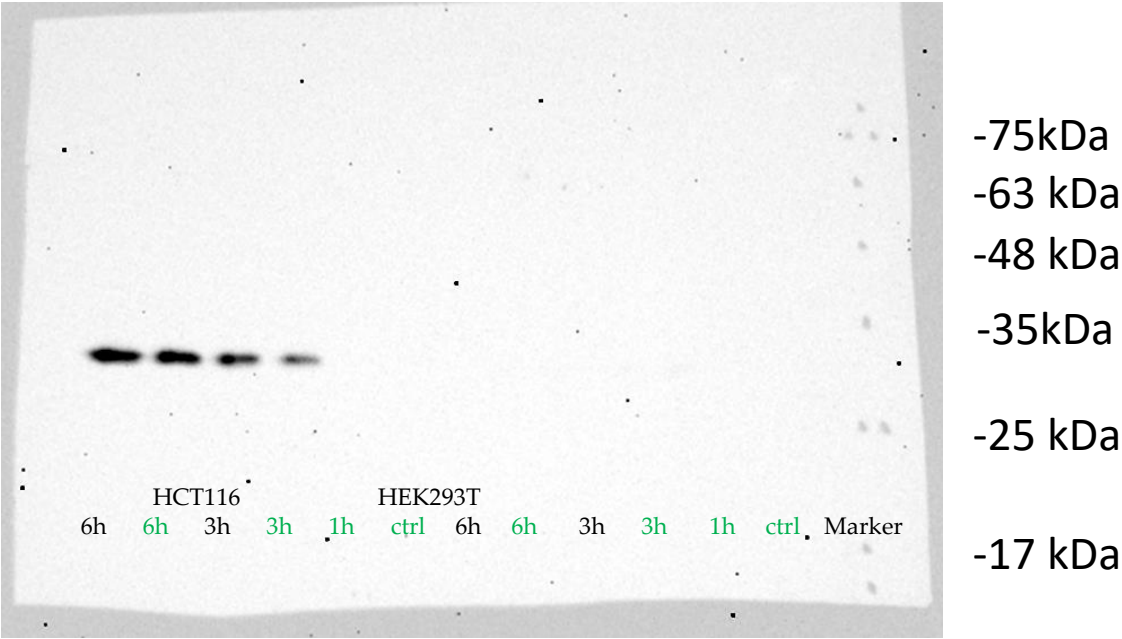

P-IRE1alpha Exp 2 gel 2

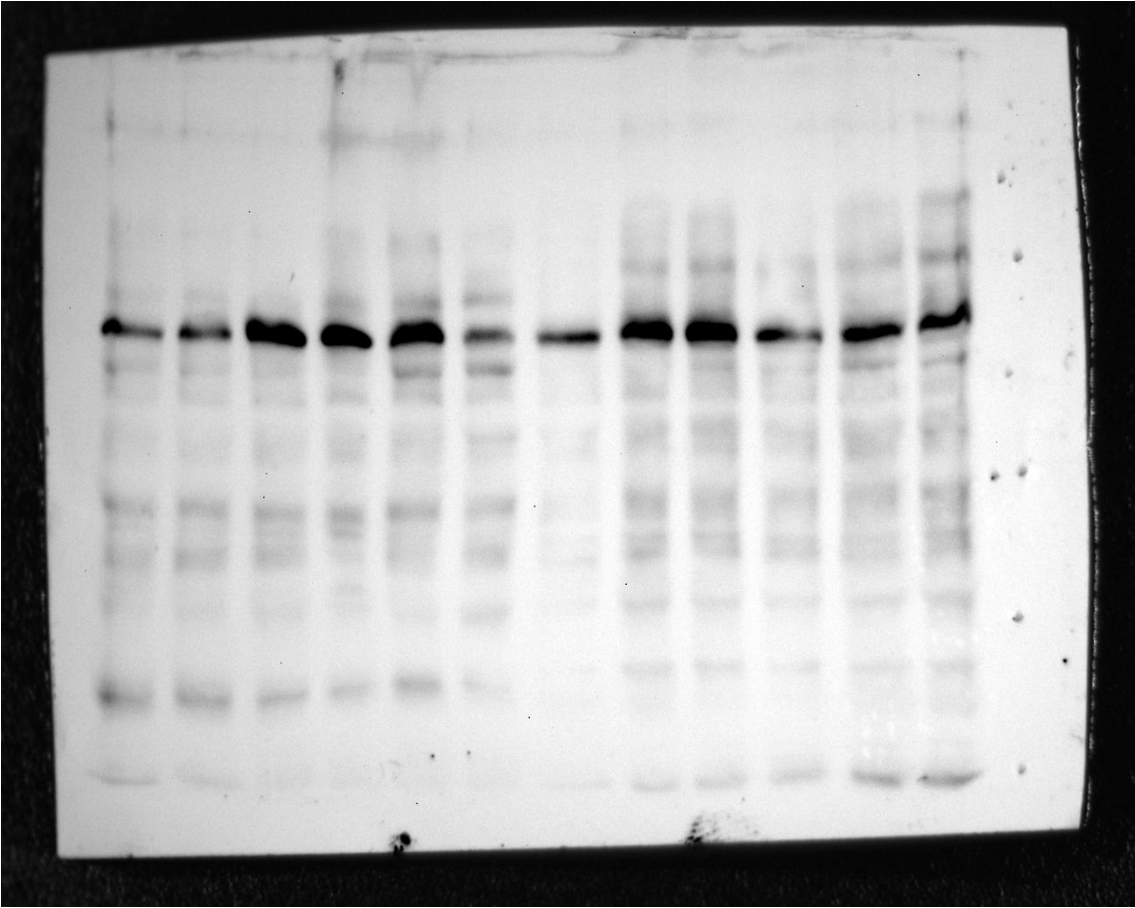

|    |    |        |    |    |      |    |    |         |    |    |      |        |  |
|----|----|--------|----|----|------|----|----|---------|----|----|------|--------|--|
|    |    | HCT116 |    |    |      |    |    | HEK293T |    |    |      |        |  |
| 6h | 6h | 3h     | 3h | 1h | ctrl | 6h | 6h | 3h      | 3h | 1h | ctrl | Marker |  |

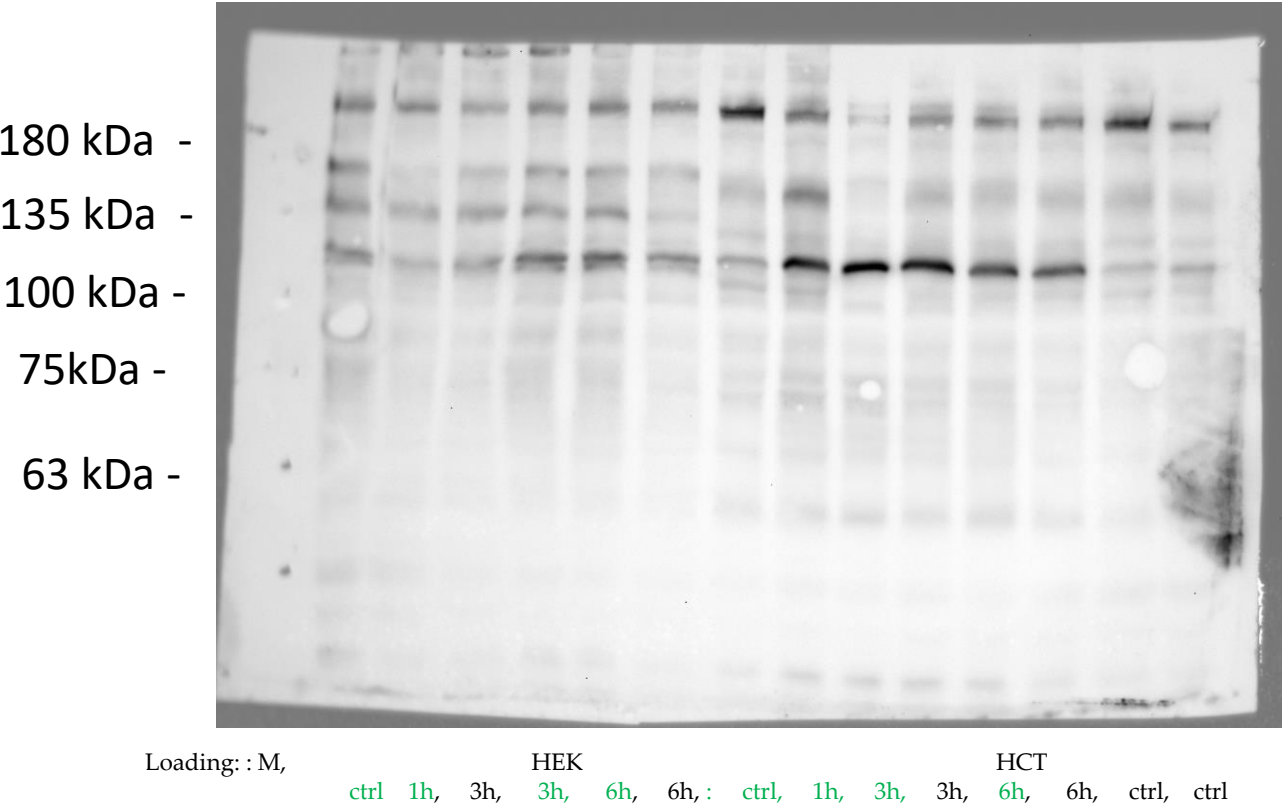

Uncropped blots for Fig. S1: IRE1alpha Exp 2 Gel 3

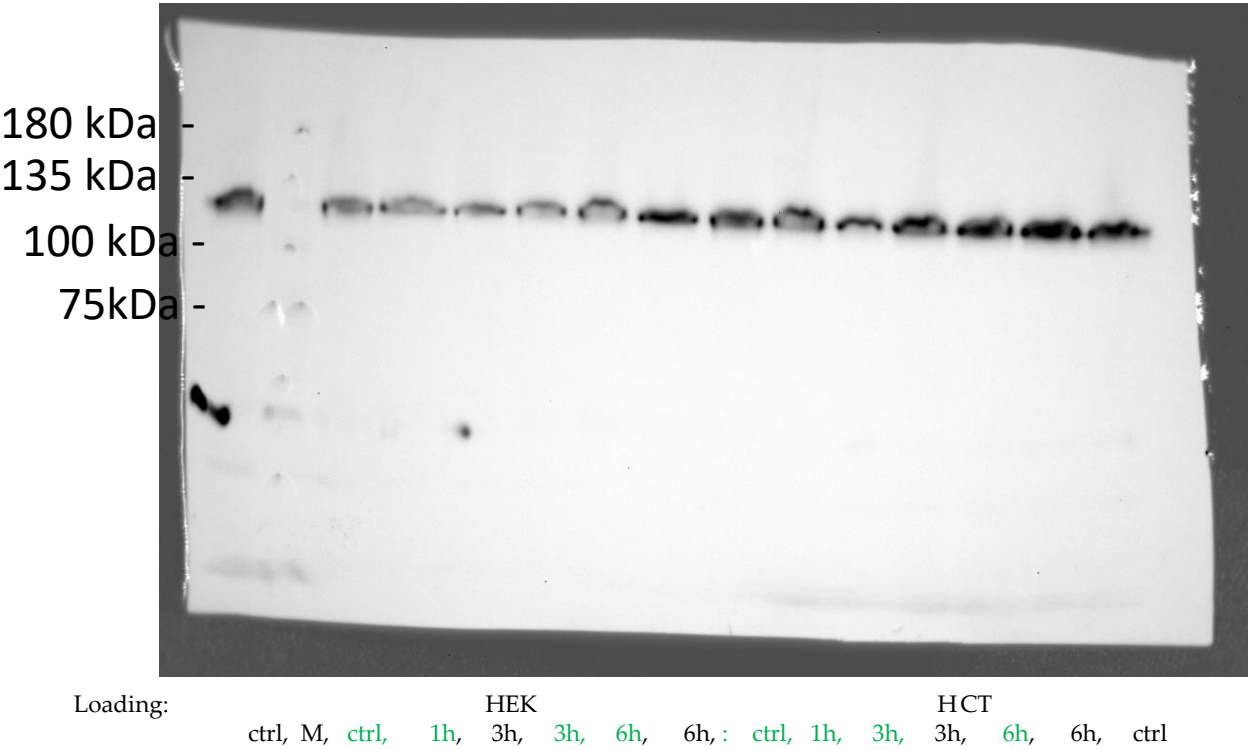

Uncropped blots for Fig. S1: Actin, Exp 2, 12.5% gel

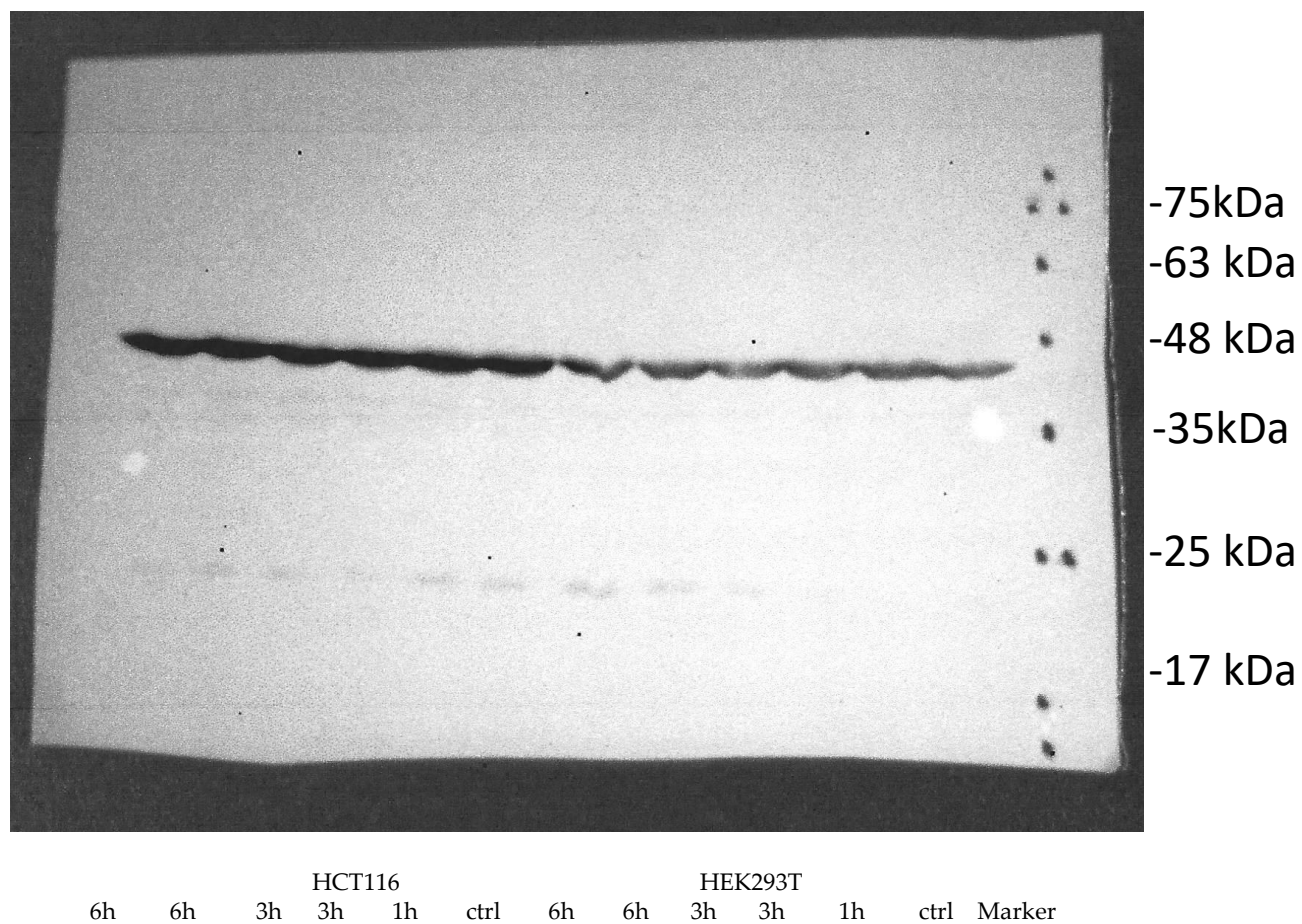

Uncropped blots for Fig. S1: P-EIF2-alpha, Exp 2, 12.5 % gel

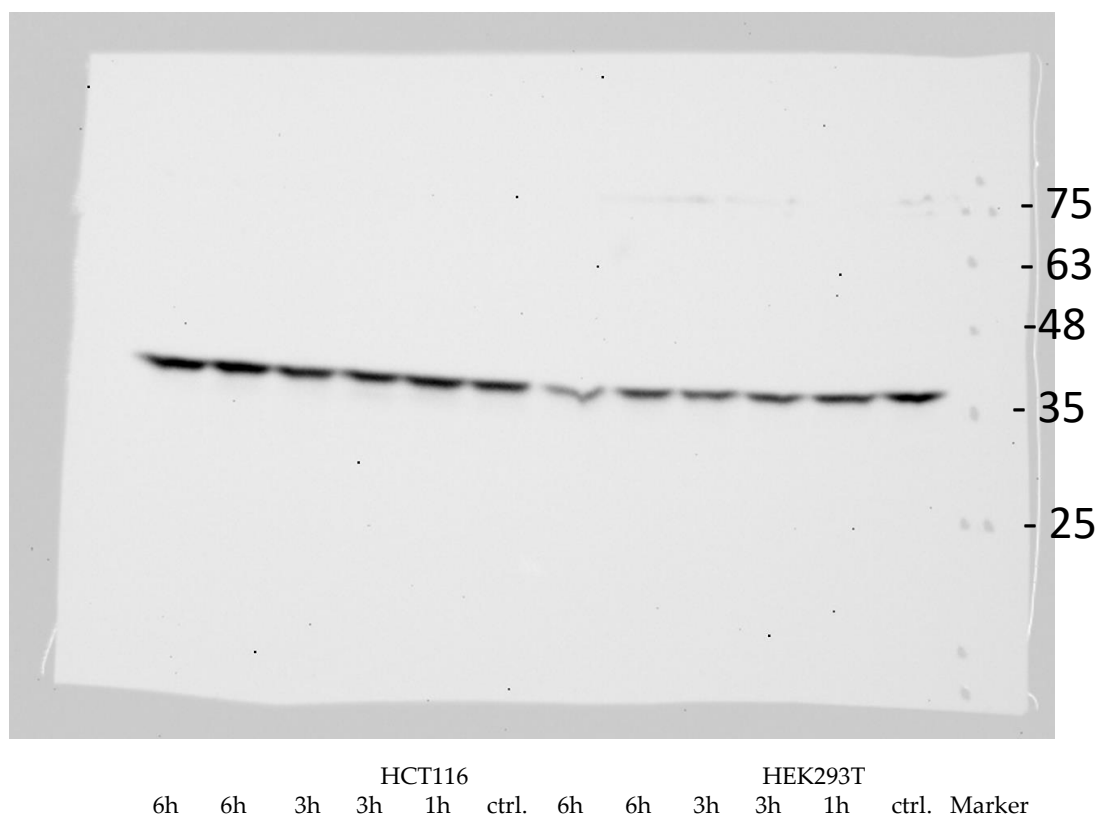

Uncropped blots for FigS1: eIF2- $\alpha$

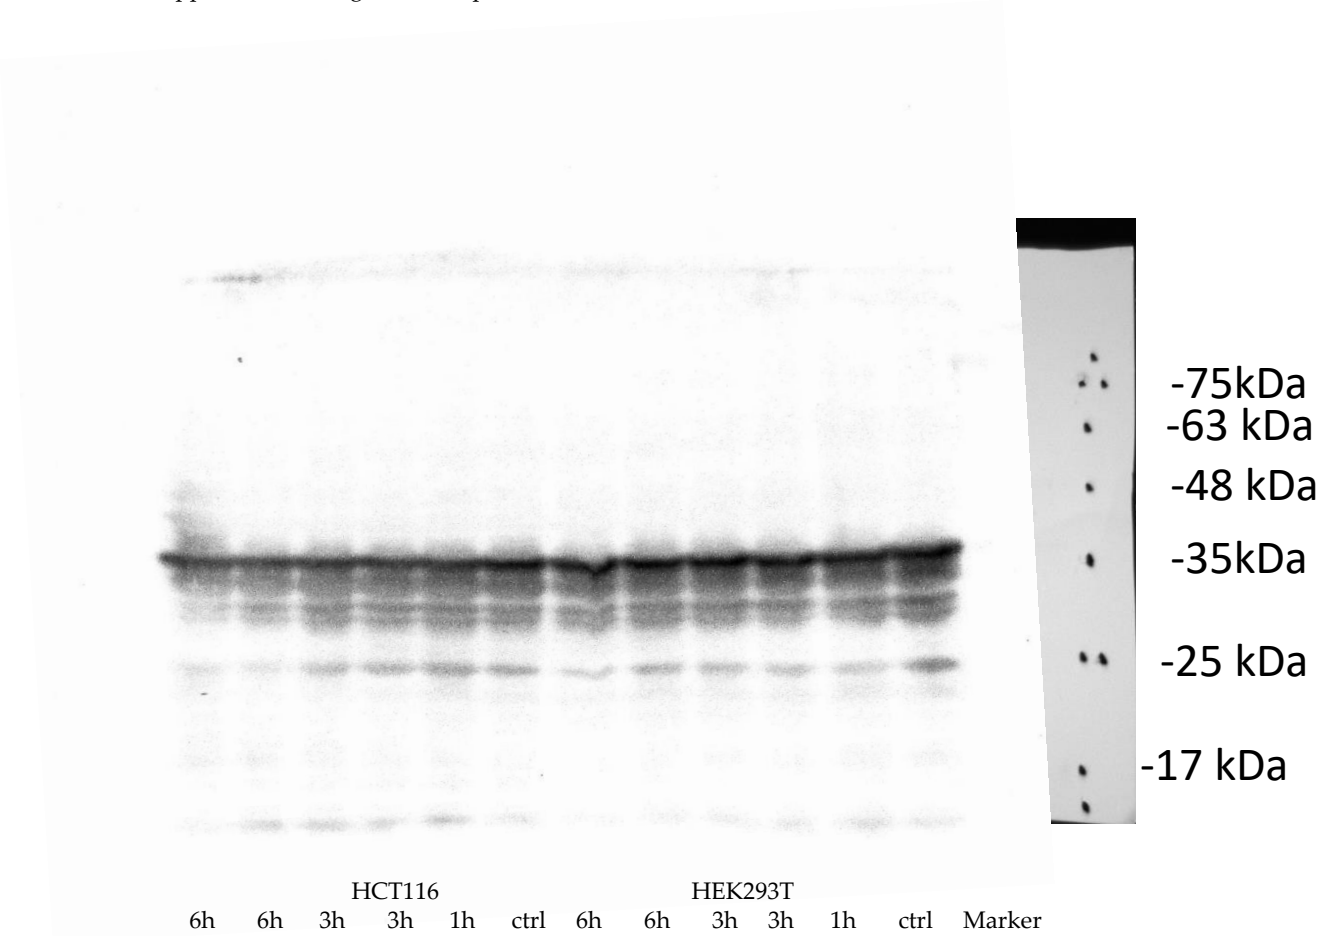

Supplement: s1 [file s1]
