# Supplementary material for: Interactome Mapping of eIF3A in a Colon Cancer and an Immortalized Embryonic Cell Line Using Proximity-Dependent Biotin Identification
Source: Cancers (Basel). 2021 Mar 14;13(6):1293. doi: 10.3390/cancers13061293 (PMC7999522; doi:10.3390/cancers13061293)
Supplement: Supplementary file 1 [file cancers-13-01293-s001.zip]

Archive with 17 entries (17 files):
- sup fig S1.tif
- sup Fig S2 western new copy 2.tif
- Suppl fig 3 CoIP.tif
- Suppl Fig 4A HCT 6h.tif
- Suppl Fig 4B HCT 24h.tif
- Suppl Fig 4C HEK 24h.tif
- Suppl Fig 5 B LSM cyclophilin eif3A_2.tif
- Suppl Fig 5A LSM nucleophosmin eIF3a 600 dpi.tif
- Suppl Fig 5C YB1.tif
- Suppl Fig 5D 3D.tif
- Suppl Fig 5E 4A1.tif
- supplementary materials.pdf
- Table S1.docx
- Table S2 Filter_Genecodis_biological_process.xlsx
- Table S3 Filter_Genecodis_cellular_component.xlsx
- Table S4 Filter_Genecodis_molecular_function.xlsx
- Table S5 HCT vs HEK.xlsx
