# Supplementary material for: Interactome Mapping of eIF3A in a Colon Cancer and an Immortalized Embryonic Cell Line Using Proximity-Dependent Biotin Identification
Source: Cancers (Basel). 2021 Mar 14;13(6):1293. doi: 10.3390/cancers13061293 (PMC7999522; doi:10.3390/cancers13061293)
Supplement: Supplementary file 1 [file cancers-13-01293-s001.zip › Table S2 Filter_Genecodis_biological_process.xlsx]

## Sheet: Filter_Genecodis_biological_pro
term	annotation	term_genes_found	input_size	term_genes	genes_universe	hyp_pval	hyp_pval_adj	genes
translational initiation	GO:0006413	18	79	147	18883	6.95e-22	5.52e-19	RL35_HUMAN,EIF3G_HUMAN,EIF3D_HUMAN,EIF3C_HUMAN,EIF3A_HUMAN,RS29_HUMAN,RS19_HUMAN,RS18_HUMAN,RS17_HUMAN,RS13_HUMAN,RS5_HUMAN,RS3A_HUMAN,RL39_HUMAN,RL38_HUMAN,RL37A_HUMAN,RL23A_HUMAN,RL9_HUMAN,IF4A1_HUMAN
translation	GO:0006412	21	79	315	18883	7.42e-20	2.94e-17	RL35_HUMAN,RACK1_HUMAN,EIF3G_HUMAN,EIF3D_HUMAN,EIF3C_HUMAN,EIF3A_HUMAN,EFTU_HUMAN,RS29_HUMAN,RS19_HUMAN,RS18_HUMAN,RS17_HUMAN,RS13_HUMAN,RS5_HUMAN,RS3A_HUMAN,RL39_HUMAN,RL38_HUMAN,RL37A_HUMAN,RL23A_HUMAN,RL9_HUMAN,SYFA_HUMAN,IF4A1_HUMAN
SRP-dependent cotranslational protein targeting to membrane	GO:0006614	13	79	89	18883	4.67e-17	1.24e-14	RL35_HUMAN,RS29_HUMAN,RS19_HUMAN,RS18_HUMAN,RS17_HUMAN,RS13_HUMAN,RS5_HUMAN,RS3A_HUMAN,RL39_HUMAN,RL38_HUMAN,RL37A_HUMAN,RL23A_HUMAN,RL9_HUMAN
viral transcription	GO:0019083	13	79	109	18883	7.27e-16	1.44e-13	RL35_HUMAN,RS29_HUMAN,RS19_HUMAN,RS18_HUMAN,RS17_HUMAN,RS13_HUMAN,RS5_HUMAN,RS3A_HUMAN,RL39_HUMAN,RL38_HUMAN,RL37A_HUMAN,RL23A_HUMAN,RL9_HUMAN
nuclear-transcribed mRNA catabolic process, nonsense-mediated decay	GO:0000184	13	79	117	18883	1.88e-15	2.98e-13	RL35_HUMAN,RS29_HUMAN,RS19_HUMAN,RS18_HUMAN,RS17_HUMAN,RS13_HUMAN,RS5_HUMAN,RS3A_HUMAN,RL39_HUMAN,RL38_HUMAN,RL37A_HUMAN,RL23A_HUMAN,RL9_HUMAN
cytoplasmic translational initiation	GO:0002183	5	79	17	18883	6.71e-09	8.87e-07	EIF3G_HUMAN,EIF3D_HUMAN,EIF3C_HUMAN,EIF3A_HUMAN,IF4A1_HUMAN
viral process	GO:0016032	15	79	577	18883	1.4e-08	1.59e-06	RACK1_HUMAN,EIF3D_HUMAN,EIF3A_HUMAN,EFTU_HUMAN,PPIA_HUMAN,NPM_HUMAN,CH60_HUMAN,HS90A_HUMAN,HSPB1_HUMAN,HSP7C_HUMAN,ROA1_HUMAN,HMGB1_HUMAN,H2AX_HUMAN,IF4A1_HUMAN,DHX9_HUMAN
formation of cytoplasmic translation initiation complex	GO:0001732	4	79	16	18883	4.97e-07	4.93e-05	EIF3G_HUMAN,EIF3D_HUMAN,EIF3C_HUMAN,EIF3A_HUMAN
neutrophil degranulation	GO:0043312	12	79	484	18883	7.57e-07	5.46e-05	PPIA_HUMAN,ACLY_HUMAN,PLAK_HUMAN,HS90B_HUMAN,HS90A_HUMAN,HSP7C_HUMAN,HMGB1_HUMAN,FILA2_HUMAN,HORN_HUMAN,ALDOA_HUMAN,DESP_HUMAN,DSG1_HUMAN
viral translational termination-reinitiation	GO:0075525	3	79	5	18883	7.01e-07	5.56e-05	EIF3G_HUMAN,EIF3D_HUMAN,EIF3A_HUMAN
response to unfolded protein	GO:0006986	6	79	74	18883	6.53e-07	5.76e-05	CH60_HUMAN,HS90B_HUMAN,HS90A_HUMAN,HSPB1_HUMAN,HSP7C_HUMAN,BIP_HUMAN
protein stabilization	GO:0050821	8	79	191	18883	1.34e-06	7.58e-05	PHB2_HUMAN,TCPZ_HUMAN,PROF1_HUMAN,CH60_HUMAN,HS90B_HUMAN,HS90A_HUMAN,G3P_HUMAN,DSG1_HUMAN
protein refolding	GO:0042026	4	79	20	18883	1.31e-06	7.98e-05	CH60_HUMAN,HS90A_HUMAN,HSP7C_HUMAN,BIP_HUMAN
gluconeogenesis	GO:0006094	5	79	45	18883	1.21e-06	7.99e-05	M2OM_HUMAN,MDHC_HUMAN,G3P_HUMAN,ALDOA_HUMAN,ENOA_HUMAN
negative regulation of apoptotic process	GO:0043066	12	79	547	18883	2.71e-06	0.000143352	PHB2_HUMAN,COF1_HUMAN,YBOX3_HUMAN,1433Z_HUMAN,RS3A_HUMAN,PTMA_HUMAN,NPM_HUMAN,CH60_HUMAN,HS90B_HUMAN,HSPB1_HUMAN,BIP_HUMAN,ATD3A_HUMAN
glycolytic process	GO:0006096	4	79	36	18883	1.51e-05	0.000705062	LDHA_HUMAN,G3P_HUMAN,ALDOA_HUMAN,ENOA_HUMAN
cellular response to interleukin-7	GO:0098761	3	79	12	18883	1.51e-05	0.000748826	STIP1_HUMAN,YBOX1_HUMAN,CH60_HUMAN
cytoplasmic translation	GO:0002181	4	79	42	18883	2.81e-05	0.00124145	RS29_HUMAN,RL39_HUMAN,RL38_HUMAN,RL9_HUMAN
carboxylic acid metabolic process	GO:0019752	3	79	18	18883	5.5e-05	0.00229694	MDHC_HUMAN,LDHB_HUMAN,LDHA_HUMAN
protein folding	GO:0006457	6	79	175	18883	9.23e-05	0.00333241	TCPZ_HUMAN,PPIA_HUMAN,CH60_HUMAN,HS90B_HUMAN,HS90A_HUMAN,HSP7C_HUMAN
ribosomal small subunit biogenesis	GO:0042274	3	79	21	18883	8.88e-05	0.00335673	RS19_HUMAN,RS17_HUMAN,NPM_HUMAN
chaperone-mediated protein complex assembly	GO:0051131	3	79	21	18883	8.88e-05	0.00335673	CH60_HUMAN,HS90B_HUMAN,HS90A_HUMAN
canonical glycolysis	GO:0061621	3	79	27	18883	0.000191751	0.00609	G3P_HUMAN,ALDOA_HUMAN,ENOA_HUMAN
chaperone-mediated protein folding	GO:0061077	3	79	30	18883	0.000263763	0.00698093	HSPB1_HUMAN,HSP7C_HUMAN,UN45A_HUMAN
establishment of cell polarity	GO:0030010	3	79	35	18883	0.000418854	0.00978147	COF1_HUMAN,HS90B_HUMAN,HS90A_HUMAN
negative regulation of translation	GO:0017148	4	79	86	18883	0.000464521	0.010538	RACK1_HUMAN,GLYM_HUMAN,YBOX1_HUMAN,G3P_HUMAN
response to cold	GO:0009409	3	79	38	18883	0.000535021	0.0108925	YBOX3_HUMAN,CH60_HUMAN,HS90A_HUMAN
response to cocaine	GO:0042220	3	79	43	18883	0.000771008	0.0130251	CH60_HUMAN,HS90B_HUMAN,BIP_HUMAN
DNA recombination	GO:0006310	4	79	104	18883	0.000950279	0.0150904	RUVB1_HUMAN,APEX1_HUMAN,HMGB1_HUMAN,H2AX_HUMAN
substantia nigra development	GO:0021762	3	79	46	18883	0.000939869	0.0152297	ACTB_HUMAN,LDHA_HUMAN,BIP_HUMAN
antimicrobial humoral immune response mediated by antimicrobial peptide	GO:0061844	4	79	106	18883	0.0010202	0.0158832	RS19_HUMAN,RL39_HUMAN,G3P_HUMAN,DCD_HUMAN
response to virus	GO:0009615	4	79	110	18883	0.00117077	0.0178768	COF1_HUMAN,DDX21_HUMAN,HSPB1_HUMAN,ENOA_HUMAN
regulation of mRNA stability	GO:0043488	4	79	115	18883	0.00138008	0.0206751	1433Z_HUMAN,APEX1_HUMAN,HSPB1_HUMAN,HSP7C_HUMAN
RNA splicing	GO:0008380	6	79	293	18883	0.00142755	0.0209903	RBM39_HUMAN,YBOX1_HUMAN,HNRPM_HUMAN,HSP7C_HUMAN,ROA1_HUMAN,DHX9_HUMAN
response to drug	GO:0042493	6	79	305	18883	0.00174956	0.0252573	RPN2_HUMAN,LDHA_HUMAN,APEX1_HUMAN,CH60_HUMAN,HS90B_HUMAN,ACACB_HUMAN
protein homotetramerization	GO:0051289	3	79	59	18883	0.00193582	0.0265007	GLYM_HUMAN,ACACB_HUMAN,ALDOA_HUMAN
cellular response to heat	GO:0034605	3	79	64	18883	0.0024441	0.0318134	CH60_HUMAN,HS90B_HUMAN,HS90A_HUMAN
regulation of growth	GO:0040008	3	79	79	18883	0.00443552	0.033541	RACK1_HUMAN,RUVB1_HUMAN,TKT_HUMAN
mRNA processing	GO:0006397	6	79	372	18883	0.00466369	0.0346072	RBM39_HUMAN,YBOX1_HUMAN,HNRPM_HUMAN,HSP7C_HUMAN,ROA1_HUMAN,DHX9_HUMAN
positive regulation of translation	GO:0045727	3	79	81	18883	0.00475709	0.0349734	EIF3D_HUMAN,EIF3C_HUMAN,NPM_HUMAN
killing of cells of other organism	GO:0031640	3	79	70	18883	0.00315404	0.0385278	RS19_HUMAN,G3P_HUMAN,DCD_HUMAN
mRNA splicing, via spliceosome	GO:0000398	5	79	247	18883	0.00377552	0.0447428	YBOX1_HUMAN,HNRPM_HUMAN,HSP7C_HUMAN,ROA1_HUMAN,DHX9_HUMAN
positive regulation of interleukin-6 production	GO:0032755	3	79	92	18883	0.0067759	0.0463798	CH60_HUMAN,HMGB1_HUMAN,DHX9_HUMAN
regulation of translation	GO:0006417	4	79	154	18883	0.00397923	0.0464634	RACK1_HUMAN,RL38_HUMAN,G3P_HUMAN,DHX9_HUMAN
regulation of cellular response to heat	GO:1900034	3	79	77	18883	0.00412754	0.0474966	HS90B_HUMAN,HS90A_HUMAN,HSP7C_HUMAN
muscle organ development	GO:0007517	3	79	104	18883	0.00948109	0.0498542	EMD_HUMAN,MRTFB_HUMAN,UN45A_HUMAN
