# Supplementary material for: Interactome Mapping of eIF3A in a Colon Cancer and an Immortalized Embryonic Cell Line Using Proximity-Dependent Biotin Identification
Source: Cancers (Basel). 2021 Mar 14;13(6):1293. doi: 10.3390/cancers13061293 (PMC7999522; doi:10.3390/cancers13061293)
Supplement: Supplementary file 1 [file cancers-13-01293-s001.zip › Table S3 Filter_Genecodis_cellular_component.xlsx]

## Sheet: Filter_Genecodis_cellular_compo
term	annotation	term_genes_found	input_size	term_genes	genes_universe	hyp_pval	hyp_pval_adj	genes
extracellular exosome	GO:0070062	45	80	2170	19614	7.13732e-23	1.69868e-20	SERA_HUMAN,COF1_HUMAN,RACK1_HUMAN,TCPZ_HUMAN,RUVB1_HUMAN,1433Z_HUMAN,EFTU_HUMAN,TKT_HUMAN,GLYM_HUMAN,ACTB_HUMAN,RS29_HUMAN,RS19_HUMAN,RS18_HUMAN,RS13_HUMAN,RS5_HUMAN,RS3A_HUMAN,RL37A_HUMAN,RL23A_HUMAN,PPIA_HUMAN,PROF1_HUMAN,YBOX1_HUMAN,ACLY_HUMAN,HNRPM_HUMAN,MYL6_HUMAN,MDHC_HUMAN,LDHB_HUMAN,LDHA_HUMAN,PLAK_HUMAN,CH60_HUMAN,HS90B_HUMAN,HS90A_HUMAN,HSPB1_HUMAN,HSP7C_HUMAN,BIP_HUMAN,ROA1_HUMAN,H2AX_…
cytosol	GO:0005829	59	80	5175	19614	1.11356e-18	1.32514e-16	SERA_HUMAN,COF1_HUMAN,RL35_HUMAN,STIP1_HUMAN,RACK1_HUMAN,TCPZ_HUMAN,DDX21_HUMAN,EIF3G_HUMAN,EIF3D_HUMAN,EIF3C_HUMAN,EIF3A_HUMAN,RUVB1_HUMAN,YBOX3_HUMAN,1433Z_HUMAN,TKT_HUMAN,GLYM_HUMAN,ACTB_HUMAN,RS29_HUMAN,RS19_HUMAN,RS18_HUMAN,RS17_HUMAN,RS13_HUMAN,RS5_HUMAN,RS3A_HUMAN,RL39_HUMAN,RL38_HUMAN,RL37A_HUMAN,RL23A_HUMAN,RL9_HUMAN,PTMA_HUMAN,PPIA_HUMAN,PROF1_HUMAN,YBOX1_HUMAN,NPM_HUMAN,ACLY_HUMAN,MYL6…
focal adhesion	GO:0005925	20	80	418	19614	2.60152e-16	2.06388e-14	COF1_HUMAN,1433Z_HUMAN,ACTB_HUMAN,RS29_HUMAN,RS19_HUMAN,RS18_HUMAN,RS17_HUMAN,RS13_HUMAN,RS5_HUMAN,RS3A_HUMAN,RL38_HUMAN,RL37A_HUMAN,RL9_HUMAN,PPIA_HUMAN,PROF1_HUMAN,NPM_HUMAN,PLAK_HUMAN,HSPB1_HUMAN,HSP7C_HUMAN,BIP_HUMAN
ribosome	GO:0005840	15	80	237	19614	3.6231e-14	2.15574e-12	RL35_HUMAN,RACK1_HUMAN,RS29_HUMAN,RS19_HUMAN,RS18_HUMAN,RS17_HUMAN,RS13_HUMAN,RS5_HUMAN,RS3A_HUMAN,RL39_HUMAN,RL38_HUMAN,RL37A_HUMAN,RL23A_HUMAN,RL9_HUMAN,APEX1_HUMAN
cytosolic small ribosomal subunit	GO:0022627	8	80	47	19614	1.47911e-11	7.04056e-10	RACK1_HUMAN,RS29_HUMAN,RS19_HUMAN,RS18_HUMAN,RS17_HUMAN,RS13_HUMAN,RS5_HUMAN,RS3A_HUMAN
ribonucleoprotein complex	GO:1990904	11	80	160	19614	4.85749e-11	1.9268e-09	RUVB1_HUMAN,ACTB_HUMAN,RS5_HUMAN,RS3A_HUMAN,YBOX1_HUMAN,NPM_HUMAN,HNRPM_HUMAN,HSP7C_HUMAN,ROA1_HUMAN,G3P_HUMAN,DHX9_HUMAN
nucleus	GO:0005634	55	80	6594	19614	1.39335e-10	4.73739e-09	PHB2_HUMAN,COF1_HUMAN,STIP1_HUMAN,RACK1_HUMAN,RBM39_HUMAN,DDX21_HUMAN,EIF3G_HUMAN,EIF3A_HUMAN,RUVB1_HUMAN,YBOX3_HUMAN,M2OM_HUMAN,1433Z_HUMAN,VDAC2_HUMAN,GLYM_HUMAN,ACTB_HUMAN,RS19_HUMAN,RS18_HUMAN,RS13_HUMAN,RS3A_HUMAN,RL37A_HUMAN,RL23A_HUMAN,RL9_HUMAN,PTMA_HUMAN,ATPO_HUMAN,PPIA_HUMAN,PROF1_HUMAN,YBOX1_HUMAN,NPM_HUMAN,HNRPM_HUMAN,LDHA_HUMAN,PLAK_HUMAN,APEX1_HUMAN,HS90B_HUMAN,HS90A_HUMAN,HSPB1_HUM…
cytoplasm	GO:0005737	52	80	6873	19614	4.47159e-08	1.18249e-06	PHB2_HUMAN,COF1_HUMAN,STIP1_HUMAN,RACK1_HUMAN,TCPZ_HUMAN,DDX21_HUMAN,EIF3G_HUMAN,EIF3D_HUMAN,EIF3C_HUMAN,EIF3A_HUMAN,RUVB1_HUMAN,YBOX3_HUMAN,1433Z_HUMAN,GLYM_HUMAN,ACTB_HUMAN,RS29_HUMAN,RS19_HUMAN,RS18_HUMAN,RS3A_HUMAN,RL23A_HUMAN,PPIA_HUMAN,PROF1_HUMAN,YBOX1_HUMAN,NPM_HUMAN,ACLY_HUMAN,HNRPM_HUMAN,MDHC_HUMAN,LDHB_HUMAN,LDHA_HUMAN,PLAK_HUMAN,APEX1_HUMAN,CH60_HUMAN,HS90B_HUMAN,HS90A_HUMAN,HSPB1_HUM…
ficolin-1-rich granule lumen	GO:1904813	8	80	124	19614	4.02545e-08	1.19757e-06	PPIA_HUMAN,ACLY_HUMAN,PLAK_HUMAN,HS90B_HUMAN,HS90A_HUMAN,HSP7C_HUMAN,HMGB1_HUMAN,ALDOA_HUMAN
cytosolic large ribosomal subunit	GO:0022625	6	80	59	19614	1.44327e-07	3.43498e-06	RL35_HUMAN,RL39_HUMAN,RL38_HUMAN,RL37A_HUMAN,RL23A_HUMAN,RL9_HUMAN
eukaryotic 48S preinitiation complex	GO:0033290	4	80	15	19614	3.38435e-07	7.3225e-06	EIF3G_HUMAN,EIF3D_HUMAN,EIF3C_HUMAN,EIF3A_HUMAN
eukaryotic translation initiation factor 3 complex	GO:0005852	4	80	16	19614	4.49849e-07	8.922e-06	EIF3G_HUMAN,EIF3D_HUMAN,EIF3C_HUMAN,EIF3A_HUMAN
eukaryotic 43S preinitiation complex	GO:0016282	4	80	17	19614	5.86442e-07	1.07364e-05	EIF3G_HUMAN,EIF3D_HUMAN,EIF3C_HUMAN,EIF3A_HUMAN
mitochondrial nucleoid	GO:0042645	5	80	44	19614	9.53495e-07	1.62094e-05	VDAC2_HUMAN,EFTU_HUMAN,GLYM_HUMAN,ECHB_HUMAN,ATD3A_HUMAN
cornified envelope	GO:0001533	5	80	45	19614	1.06927e-06	1.69657e-05	PLAK_HUMAN,FILA2_HUMAN,HORN_HUMAN,DESP_HUMAN,DSG1_HUMAN
small ribosomal subunit	GO:0015935	4	80	29	19614	5.63862e-06	8.38745e-05	RACK1_HUMAN,RS29_HUMAN,RS18_HUMAN,RS5_HUMAN
secretory granule lumen	GO:0034774	6	80	115	19614	7.52008e-06	0.000105281	PPIA_HUMAN,HS90B_HUMAN,HS90A_HUMAN,HSP7C_HUMAN,HMGB1_HUMAN,ALDOA_HUMAN
nucleoplasm	GO:0005654	32	80	3719	19614	1.01131e-05	0.00012668	RACK1_HUMAN,RBM39_HUMAN,DDX21_HUMAN,EIF3A_HUMAN,RUVB1_HUMAN,1433Z_HUMAN,TKT_HUMAN,ACTB_HUMAN,RS29_HUMAN,RS19_HUMAN,RS18_HUMAN,RS17_HUMAN,RS13_HUMAN,RS5_HUMAN,RS3A_HUMAN,PTMA_HUMAN,YBOX1_HUMAN,NPM_HUMAN,ACLY_HUMAN,HNRPM_HUMAN,APEX1_HUMAN,HS90B_HUMAN,HS90A_HUMAN,HSP7C_HUMAN,ROA1_HUMAN,HMGB1_HUMAN,H2AX_HUMAN,EMD_HUMAN,DHX9_HUMAN,ARGL1_HUMAN,LC7L2_HUMAN,CYBP_HUMAN
polysomal ribosome	GO:0042788	4	80	34	19614	1.08407e-05	0.000129004	RS29_HUMAN,RL39_HUMAN,RL38_HUMAN,DHX9_HUMAN
mitochondrion	GO:0005739	19	80	1553	19614	1.14265e-05	0.000129501	PHB2_HUMAN,RACK1_HUMAN,DDX21_HUMAN,M2OM_HUMAN,1433Z_HUMAN,VDAC2_HUMAN,EFTU_HUMAN,GLYM_HUMAN,ATPO_HUMAN,APEX1_HUMAN,CH60_HUMAN,HS90B_HUMAN,HS90A_HUMAN,BIP_HUMAN,ACACB_HUMAN,ECHB_HUMAN,MCCA_HUMAN,ATD3A_HUMAN,ARGL1_HUMAN
vesicle	GO:0031982	7	80	183	19614	9.81695e-06	0.000129802	COF1_HUMAN,1433Z_HUMAN,TKT_HUMAN,ACTB_HUMAN,PPIA_HUMAN,MYL6_HUMAN,G3P_HUMAN
melanosome	GO:0042470	5	80	99	19614	5.27146e-05	0.000570277	1433Z_HUMAN,HS90B_HUMAN,HS90A_HUMAN,HSP7C_HUMAN,BIP_HUMAN
membrane	GO:0016020	49	80	7884	19614	0.00011226	0.00111324	PHB2_HUMAN,COF1_HUMAN,RL35_HUMAN,RACK1_HUMAN,DDX21_HUMAN,EIF3D_HUMAN,EIF3A_HUMAN,RUVB1_HUMAN,M2OM_HUMAN,VDAC2_HUMAN,EFTU_HUMAN,GLYM_HUMAN,ACTB_HUMAN,RS19_HUMAN,RS18_HUMAN,RS17_HUMAN,RS13_HUMAN,RS5_HUMAN,RPN2_HUMAN,RL9_HUMAN,ATPO_HUMAN,PPIA_HUMAN,PROF1_HUMAN,NPM_HUMAN,ACLY_HUMAN,HNRPM_HUMAN,MYL6_HUMAN,LDHB_HUMAN,LDHA_HUMAN,PLAK_HUMAN,CH60_HUMAN,HS90B_HUMAN,HS90A_HUMAN,HSP7C_HUMAN,BIP_HUMAN,ROA1_HU…
desmosome	GO:0030057	3	80	26	19614	0.000158762	0.00151141	PLAK_HUMAN,DESP_HUMAN,DSG1_HUMAN
protein-containing complex	GO:0032991	11	80	745	19614	0.000212098	0.00194151	PHB2_HUMAN,STIP1_HUMAN,RBM39_HUMAN,ACTB_HUMAN,PPIA_HUMAN,NPM_HUMAN,CH60_HUMAN,HS90B_HUMAN,HS90A_HUMAN,BIP_HUMAN,DHX9_HUMAN
perinuclear region of cytoplasm	GO:0048471	10	80	722	19614	0.000690509	0.00547804	RACK1_HUMAN,EIF3G_HUMAN,YBOX3_HUMAN,APEX1_HUMAN,HS90B_HUMAN,HS90A_HUMAN,HSP7C_HUMAN,HORN_HUMAN,G3P_HUMAN,UN45A_HUMAN
postsynaptic density	GO:0014069	6	80	282	19614	0.00103313	0.00745102	PHB2_HUMAN,EIF3A_HUMAN,RS19_HUMAN,RS18_HUMAN,RS13_HUMAN,RL38_HUMAN
nuclear matrix	GO:0016363	4	80	109	19614	0.00103173	0.00767351	PHB2_HUMAN,COF1_HUMAN,RUVB1_HUMAN,HNRPM_HUMAN
cell-cell junction	GO:0005911	5	80	200	19614	0.00135714	0.00922854	COF1_HUMAN,ACTB_HUMAN,PLAK_HUMAN,DESP_HUMAN,DSG1_HUMAN
mitochondrial inner membrane	GO:0005743	7	80	454	19614	0.00252362	0.016233	PHB2_HUMAN,M2OM_HUMAN,GLYM_HUMAN,ATPO_HUMAN,CH60_HUMAN,ECHB_HUMAN,ATD3A_HUMAN
rough endoplasmic reticulum	GO:0005791	3	80	67	19614	0.0025942	0.0162479	RS29_HUMAN,RPN2_HUMAN,CH60_HUMAN
blood microparticle	GO:0072562	4	80	143	19614	0.00279043	0.0170288	1433Z_HUMAN,ACTB_HUMAN,PROF1_HUMAN,HSP7C_HUMAN
actin cytoskeleton	GO:0015629	5	80	261	19614	0.00428872	0.0231981	COF1_HUMAN,ACTB_HUMAN,PLAK_HUMAN,ALDOA_HUMAN,DHX9_HUMAN
nuclear speck	GO:0016607	6	80	404	19614	0.00614085	0.0317722	RBM39_HUMAN,TKT_HUMAN,APEX1_HUMAN,H2AX_HUMAN,UN45A_HUMAN,LC7L2_HUMAN
mitochondrial outer membrane	GO:0005741	4	80	182	19614	0.00655812	0.0332092	PHB2_HUMAN,VDAC2_HUMAN,ACACB_HUMAN,ECHB_HUMAN
nucleolus	GO:0005730	12	80	1360	19614	0.00881146	0.0355445	RL35_HUMAN,DDX21_HUMAN,EIF3A_HUMAN,RS19_HUMAN,RS13_HUMAN,RS3A_HUMAN,RL23A_HUMAN,NPM_HUMAN,HNRPM_HUMAN,APEX1_HUMAN,HSP7C_HUMAN,DHX9_HUMAN
