# Supplementary material for: Interactome Mapping of eIF3A in a Colon Cancer and an Immortalized Embryonic Cell Line Using Proximity-Dependent Biotin Identification
Source: Cancers (Basel). 2021 Mar 14;13(6):1293. doi: 10.3390/cancers13061293 (PMC7999522; doi:10.3390/cancers13061293)
Supplement: Supplementary file 1 [file cancers-13-01293-s001.zip › Table S4 Filter_Genecodis_molecular_function.xlsx]

## Sheet: Filter_Genecodis_molecular_func
term	annotation	term_genes_found	input_size	term_genes	genes_universe	hyp_pval	hyp_pval_adj	genes
RNA binding	GO:0003723	47	80	1531	18483	1.57633e-30	4.50831e-28	RL35_HUMAN,STIP1_HUMAN,RACK1_HUMAN,RBM39_HUMAN,TCPZ_HUMAN,DDX21_HUMAN,EIF3G_HUMAN,EIF3D_HUMAN,EIF3C_HUMAN,EIF3A_HUMAN,YBOX3_HUMAN,M2OM_HUMAN,1433Z_HUMAN,EFTU_HUMAN,RS19_HUMAN,RS18_HUMAN,RS17_HUMAN,RS13_HUMAN,RS5_HUMAN,RS3A_HUMAN,RL39_HUMAN,RL38_HUMAN,RL37A_HUMAN,RL23A_HUMAN,RL9_HUMAN,PPIA_HUMAN,PROF1_HUMAN,YBOX1_HUMAN,NPM_HUMAN,HNRPM_HUMAN,APEX1_HUMAN,CH60_HUMAN,HS90B_HUMAN,HS90A_HUMAN,HSPB1_HUMA…
cadherin binding	GO:0045296	16	80	316	18483	3.66666e-13	5.24332e-11	RACK1_HUMAN,RUVB1_HUMAN,1433Z_HUMAN,RL23A_HUMAN,PROF1_HUMAN,LDHA_HUMAN,PLAK_HUMAN,HS90B_HUMAN,HSP7C_HUMAN,BIP_HUMAN,ALDOA_HUMAN,ENOA_HUMAN,EMD_HUMAN,MRTFB_HUMAN,UN45A_HUMAN,ARGL1_HUMAN
structural constituent of ribosome	GO:0003735	13	80	203	18483	3.80236e-12	3.62491e-10	RL35_HUMAN,RS29_HUMAN,RS19_HUMAN,RS18_HUMAN,RS17_HUMAN,RS13_HUMAN,RS5_HUMAN,RS3A_HUMAN,RL39_HUMAN,RL38_HUMAN,RL37A_HUMAN,RL23A_HUMAN,RL9_HUMAN
unfolded protein binding	GO:0051082	8	80	115	18483	3.50641e-08	2.50708e-06	TCPZ_HUMAN,PPIA_HUMAN,NPM_HUMAN,CH60_HUMAN,HS90B_HUMAN,HS90A_HUMAN,HSP7C_HUMAN,BIP_HUMAN
mRNA binding	GO:0003729	9	80	217	18483	4.04503e-07	2.31376e-05	RL35_HUMAN,EIF3A_HUMAN,RS13_HUMAN,RS5_HUMAN,YBOX1_HUMAN,HNRPM_HUMAN,IF4A1_HUMAN,DHX9_HUMAN,LC7L2_HUMAN
rRNA binding	GO:0019843	5	80	45	18483	1.42783e-06	6.80598e-05	DDX21_HUMAN,RS18_HUMAN,RS5_HUMAN,RL23A_HUMAN,RL9_HUMAN
protein folding chaperone	GO:0044183	4	80	27	18483	5.29353e-06	0.000216278	HS90B_HUMAN,HSPB1_HUMAN,HSP7C_HUMAN,BIP_HUMAN
translation initiation factor activity	GO:0003743	5	80	60	18483	6.06717e-06	0.000216901	EIF3G_HUMAN,EIF3D_HUMAN,EIF3C_HUMAN,EIF3A_HUMAN,IF4A1_HUMAN
protein binding	GO:0005515	71	80	12556	18483	1.2879e-05	0.000409267	PHB2_HUMAN,COF1_HUMAN,STIP1_HUMAN,RACK1_HUMAN,RBM39_HUMAN,TCPZ_HUMAN,DDX21_HUMAN,EIF3G_HUMAN,EIF3D_HUMAN,EIF3C_HUMAN,EIF3A_HUMAN,RUVB1_HUMAN,YBOX3_HUMAN,1433Z_HUMAN,VDAC2_HUMAN,EFTU_HUMAN,TKT_HUMAN,GLYM_HUMAN,ACTB_HUMAN,RS19_HUMAN,RS18_HUMAN,RS13_HUMAN,RS5_HUMAN,RS3A_HUMAN,RPN2_HUMAN,RL38_HUMAN,RL37A_HUMAN,RL23A_HUMAN,RL9_HUMAN,PTMA_HUMAN,ATPO_HUMAN,PPIA_HUMAN,PROF1_HUMAN,YBOX1_HUMAN,NPM_HUMAN,AC…
double-stranded RNA binding	GO:0003725	5	80	72	18483	1.49258e-05	0.000426879	DDX21_HUMAN,CH60_HUMAN,HS90B_HUMAN,IF4A1_HUMAN,DHX9_HUMAN
NAD binding	GO:0051287	4	80	39	18483	2.38495e-05	0.000620088	SERA_HUMAN,MDHC_HUMAN,LDHA_HUMAN,G3P_HUMAN
oxidoreductase activity, acting on the CH-OH group of donors, NAD or NADP as acceptor	GO:0016616	4	80	43	18483	3.5317e-05	0.000841722	SERA_HUMAN,MDHC_HUMAN,LDHB_HUMAN,LDHA_HUMAN
MHC class II protein complex binding	GO:0023026	3	80	16	18483	4.19855e-05	0.000923682	HS90B_HUMAN,HS90A_HUMAN,HSP7C_HUMAN
nucleotide binding	GO:0000166	20	80	1781	18483	5.24302e-05	0.00107107	TCPZ_HUMAN,DDX21_HUMAN,RUVB1_HUMAN,VDAC2_HUMAN,EFTU_HUMAN,ACTB_HUMAN,ACLY_HUMAN,CH60_HUMAN,HS90B_HUMAN,HS90A_HUMAN,HSP7C_HUMAN,BIP_HUMAN,ACACB_HUMAN,G3P_HUMAN,SYFA_HUMAN,IF4A1_HUMAN,MYH14_HUMAN,DHX9_HUMAN,MCCA_HUMAN,ATD3A_HUMAN
ATPase activity	GO:0016887	7	80	237	18483	7.48079e-05	0.00142634	RUVB1_HUMAN,CH60_HUMAN,HS90A_HUMAN,HSP7C_HUMAN,BIP_HUMAN,MYH14_HUMAN,DHX9_HUMAN
DNA polymerase binding	GO:0070182	3	80	20	18483	8.44097e-05	0.00150882	HS90B_HUMAN,HS90A_HUMAN,HMGB1_HUMAN
ribosome binding	GO:0043022	4	80	55	18483	9.3833e-05	0.0015786	RACK1_HUMAN,EIF3C_HUMAN,RPN2_HUMAN,BIP_HUMAN
single-stranded DNA binding	GO:0003697	5	80	111	18483	0.000119874	0.00180441	YBOX1_HUMAN,CH60_HUMAN,ROA1_HUMAN,HMGB1_HUMAN,DHX9_HUMAN
mRNA 5'-UTR binding	GO:0048027	3	80	26	18483	0.000188943	0.00216151	GLYM_HUMAN,RS13_HUMAN,RS3A_HUMAN
ATP binding	GO:0005524	17	80	1489	18483	0.000177637	0.00241925	TCPZ_HUMAN,DDX21_HUMAN,RUVB1_HUMAN,ACTB_HUMAN,ACLY_HUMAN,CH60_HUMAN,HS90B_HUMAN,HS90A_HUMAN,HSP7C_HUMAN,BIP_HUMAN,ACACB_HUMAN,SYFA_HUMAN,IF4A1_HUMAN,MYH14_HUMAN,DHX9_HUMAN,MCCA_HUMAN,ATD3A_HUMAN
protein homodimerization activity	GO:0042803	11	80	686	18483	0.000173164	0.00247624	PHB2_HUMAN,RACK1_HUMAN,TKT_HUMAN,GLYM_HUMAN,NPM_HUMAN,PLAK_HUMAN,HS90B_HUMAN,HS90A_HUMAN,HSPB1_HUMAN,ENOA_HUMAN,CYBP_HUMAN
ubiquitin protein ligase binding	GO:0031625	7	80	298	18483	0.000306757	0.00324935	1433Z_HUMAN,CH60_HUMAN,HS90B_HUMAN,HS90A_HUMAN,HSP7C_HUMAN,BIP_HUMAN,CYBP_HUMAN
catalytic activity	GO:0003824	9	80	506	18483	0.00033247	0.00339595	TKT_HUMAN,GLYM_HUMAN,ACLY_HUMAN,MDHC_HUMAN,LDHB_HUMAN,LDHA_HUMAN,ACACB_HUMAN,ECHB_HUMAN,ALDOA_HUMAN
transcription coactivator activity	GO:0003713	7	80	306	18483	0.000359881	0.00354917	RUVB1_HUMAN,NPM_HUMAN,PLAK_HUMAN,APEX1_HUMAN,HMGB1_HUMAN,MRTFB_HUMAN,DHX9_HUMAN
miRNA binding	GO:0035198	3	80	34	18483	0.000424155	0.00391317	DDX21_HUMAN,YBOX1_HUMAN,ROA1_HUMAN
GTPase binding	GO:0051020	3	80	35	18483	0.000462477	0.00413339	YBOX1_HUMAN,HS90A_HUMAN,ENOA_HUMAN
disordered domain specific binding	GO:0097718	3	80	38	18483	0.000590557	0.00496763	HS90B_HUMAN,HS90A_HUMAN,G3P_HUMAN
lyase activity	GO:0016829	5	80	167	18483	0.00078947	0.0064511	ACLY_HUMAN,APEX1_HUMAN,HMGB1_HUMAN,ALDOA_HUMAN,ENOA_HUMAN
tau protein binding	GO:0048156	3	80	45	18483	0.000971973	0.00751308	ACTB_HUMAN,HS90B_HUMAN,HS90A_HUMAN
chaperone binding	GO:0051087	4	80	105	18483	0.00111672	0.00840476	STIP1_HUMAN,CH60_HUMAN,HSP7C_HUMAN,BIP_HUMAN
identical protein binding	GO:0042802	16	80	1638	18483	0.00154996	0.0113664	PHB2_HUMAN,DDX21_HUMAN,1433Z_HUMAN,GLYM_HUMAN,ACTB_HUMAN,RS19_HUMAN,LDHB_HUMAN,LDHA_HUMAN,HS90B_HUMAN,HS90A_HUMAN,HSPB1_HUMAN,ACACB_HUMAN,ROA1_HUMAN,G3P_HUMAN,ALDOA_HUMAN,ATD3A_HUMAN
protein kinase C binding	GO:0005080	3	80	55	18483	0.00174208	0.0124559	RACK1_HUMAN,HSPB1_HUMAN,DESP_HUMAN
damaged DNA binding	GO:0003684	3	80	60	18483	0.00223734	0.0156068	APEX1_HUMAN,HMGB1_HUMAN,H2AX_HUMAN
double-stranded DNA binding	GO:0003690	4	80	130	18483	0.00244597	0.0166559	YBOX3_HUMAN,YBOX1_HUMAN,HMGB1_HUMAN,DHX9_HUMAN
heat shock protein binding	GO:0031072	3	80	65	18483	0.00281195	0.0187027	HS90B_HUMAN,HSP7C_HUMAN,BIP_HUMAN
helicase activity	GO:0004386	4	80	141	18483	0.00327801	0.021307	DDX21_HUMAN,RUVB1_HUMAN,IF4A1_HUMAN,DHX9_HUMAN
RNA helicase activity	GO:0003724	3	80	77	18483	0.00453751	0.0227671	DDX21_HUMAN,IF4A1_HUMAN,DHX9_HUMAN
protein kinase binding	GO:0019901	7	80	480	18483	0.00473891	0.0233677	1433Z_HUMAN,ACTB_HUMAN,RS19_HUMAN,NPM_HUMAN,PLAK_HUMAN,HS90B_HUMAN,HSPB1_HUMAN
protein domain specific binding	GO:0019904	5	80	269	18483	0.00622819	0.029201	1433Z_HUMAN,HNRPM_HUMAN,BIP_HUMAN,ROA1_HUMAN,CYBP_HUMAN
structural molecule activity	GO:0005198	4	80	187	18483	0.00882989	0.0304259	EIF3A_HUMAN,PLAK_HUMAN,FILA2_HUMAN,DESP_HUMAN
enzyme binding	GO:0019899	6	80	393	18483	0.00712794	0.0328805	RACK1_HUMAN,CH60_HUMAN,HSP7C_HUMAN,BIP_HUMAN,H2AX_HUMAN,LC7L2_HUMAN
nucleic acid binding	GO:0003676	10	80	1002	18483	0.0110216	0.0370843	RBM39_HUMAN,DDX21_HUMAN,EIF3G_HUMAN,YBOX3_HUMAN,RS18_HUMAN,YBOX1_HUMAN,HNRPM_HUMAN,ROA1_HUMAN,IF4A1_HUMAN,DHX9_HUMAN
