# Supplementary material for: Interactome Mapping of eIF3A in a Colon Cancer and an Immortalized Embryonic Cell Line Using Proximity-Dependent Biotin Identification
Source: Cancers (Basel). 2021 Mar 14;13(6):1293. doi: 10.3390/cancers13061293 (PMC7999522; doi:10.3390/cancers13061293)
Supplement: Supplementary file 1 [file cancers-13-01293-s001.zip › Table S5 HCT vs HEK.xlsx]

## Sheet: HCT BP
term	annotation	term_genes_found	input_size	term_genes	genes_universe	hyp_pval	hyp_pval_adj	genes
negative regulation of apoptotic process	GO:0043066	6	21	547	18883	2.1525e-05	0.00270138	P63104,P61247,P06454,P06748,P10809,P04792
translational initiation	GO:0006413	4	21	147	18883	1.90336e-05	0.00477743	Q99613,Q14152,P08708,P61247
cytoplasmic translational initiation	GO:0002183	2	21	17	18883	0.000158598	0.00796164	Q99613,Q14152
translation	GO:0006412	4	21	315	18883	0.00036334800000000005	0.00912005	Q99613,Q14152,P08708,P61247
regulation of mRNA stability	GO:0043488	3	21	115	18883	0.000270151	0.00968686	P63104,P27695,P04792
neutrophil degranulation	GO:0043312	5	21	484	18883	0.000156964	0.00984948	P62937,Q5D862,Q86YZ3,P04075,Q02413
viral process	GO:0016032	5	21	577	18883	0.00035481900000000003	0.00989552	Q14152,P62937,P06748,P10809,P04792
ribosomal small subunit biogenesis	GO:0042274	2	21	21	18883	0.000244239	0.010217299999999999	P08708,P06748
establishment of skin barrier	GO:0061436	2	21	25	18883	0.00034797800000000004	0.0109178	Q5D862,Q86YZ3
formation of cytoplasmic translation initiation complex	GO:0001732	2	21	16	18883	0.000140034	0.0117161	Q99613,Q14152
regulation of mRNA stability involved in cellular response to UV	GO:1902629	1	21	1	18883	0.00111211	0.014691599999999999	P06748
regulation of eIF2 alpha phosphorylation by dsRNA	GO:0060735	1	21	1	18883	0.00111211	0.014691599999999999	P06748
regulation of endoribonuclease activity	GO:0060699	1	21	1	18883	0.00111211	0.014691599999999999	P06748
telomere maintenance via base-excision repair	GO:0097698	1	21	1	18883	0.00111211	0.014691599999999999	P27695
mitochondrial unfolded protein response	GO:0034514	1	21	1	18883	0.00111211	0.014691599999999999	P10809
B cell cytokine production	GO:0002368	1	21	1	18883	0.00111211	0.014691599999999999	P10809
isotype switching to IgG isotypes	GO:0048291	1	21	1	18883	0.00111211	0.014691599999999999	P10809
uncoating of virus	GO:0019061	1	21	1	18883	0.00111211	0.014691599999999999	P62937
synaptic target recognition	GO:0008039	1	21	1	18883	0.00111211	0.014691599999999999	P63104
protein stabilization	GO:0050821	3	21	191	18883	0.00118464	0.0148673	P07737,P10809,Q02413
xylulose biosynthetic process	GO:0005999	1	21	2	18883	0.00222304	0.0192408	P29401
glyceraldehyde-3-phosphate biosynthetic process	GO:0046166	1	21	2	18883	0.00222304	0.0192408	P29401
positive regulation of T cell mediated immune response to tumor cell	GO:0002842	1	21	2	18883	0.00222304	0.0192408	P10809
regulation of endodeoxyribonuclease activity	GO:0032071	1	21	2	18883	0.00222304	0.0192408	P06748
malonyl-CoA biosynthetic process	GO:2001295	1	21	2	18883	0.00222304	0.0192408	O00763
rRNA export from nucleus	GO:0006407	1	21	2	18883	0.00222304	0.0192408	P06748
ribose phosphate biosynthetic process	GO:0046390	1	21	2	18883	0.00222304	0.0192408	P29401
base-excision repair, base-free sugar-phosphate removal	GO:0006286	1	21	2	18883	0.00222304	0.0192408	P27695
protein homotetramerization	GO:0051289	2	21	59	18883	0.00193994	0.023186900000000003	O00763,P04075
protein import into mitochondrial intermembrane space	GO:0045041	1	21	3	18883	0.0033328000000000003	0.023900900000000003	P10809
cell envelope organization	GO:0043163	1	21	3	18883	0.0033328000000000003	0.023900900000000003	Q86YZ3
'de novo' protein folding	GO:0006458	1	21	3	18883	0.0033328000000000003	0.023900900000000003	P10809
regulation of viral genome replication	GO:0045069	1	21	3	18883	0.0033328000000000003	0.023900900000000003	P62937
translation reinitiation	GO:0002188	1	21	3	18883	0.0033328000000000003	0.023900900000000003	Q14152
positive regulation of translation	GO:0045727	2	21	81	18883	0.00361985	0.0252384	Q99613,P06748
response to unfolded protein	GO:0006986	2	21	74	18883	0.00303182	0.025366200000000002	P10809,P04792
response to drug	GO:0042493	3	21	305	18883	0.00447304	0.0255167	P27695,P10809,O00763
adhesion of symbiont to host	GO:0044406	1	21	4	18883	0.00444138	0.0259253	P10809
negative regulation of actin filament bundle assembly	GO:0032232	1	21	4	18883	0.00444138	0.0259253	P07737
positive regulation of heart growth	GO:0060421	1	21	4	18883	0.00444138	0.0259253	O00763
Golgi reassembly	GO:0090168	1	21	4	18883	0.00444138	0.0259253	P63104
regulation of synapse maturation	GO:0090128	1	21	4	18883	0.00444138	0.0259253	P63104
negative regulation of centrosome duplication	GO:0010826	1	21	4	18883	0.00444138	0.0259253	P06748
acetyl-CoA metabolic process	GO:0006084	1	21	6	18883	0.00665502	0.0278402	O00763
positive regulation of cellular metabolic process	GO:0031325	1	21	6	18883	0.00665502	0.0278402	O00763
positive regulation of mRNA binding	GO:1902416	1	21	6	18883	0.00665502	0.0278402	Q99613
ribosomal small subunit export from nucleus	GO:0000056	1	21	6	18883	0.00665502	0.0278402	P06748
positive regulation of cell cycle G2/M phase transition	GO:1902751	1	21	6	18883	0.00665502	0.0278402	P06748
modification of postsynaptic actin cytoskeleton	GO:0098885	1	21	6	18883	0.00665502	0.0278402	P07737
pentose-phosphate shunt, non-oxidative branch	GO:0009052	1	21	6	18883	0.00665502	0.0278402	P29401
viral release from host cell	GO:0019076	1	21	6	18883	0.00665502	0.0278402	P62937
leucine catabolic process	GO:0006552	1	21	6	18883	0.00665502	0.0278402	Q96RQ3
viral translational termination-reinitiation	GO:0075525	1	21	5	18883	0.00554879	0.027854900000000002	Q14152
positive regulation of endothelial cell chemotaxis by VEGF-activated vascular endothelial growth factor receptor signaling pathway	GO:0038033	1	21	5	18883	0.00554879	0.027854900000000002	P04792
negative regulation of fatty acid beta-oxidation	GO:0031999	1	21	5	18883	0.00554879	0.027854900000000002	O00763
interaction with symbiont	GO:0051702	1	21	5	18883	0.00554879	0.027854900000000002	P10809
cellular response to organonitrogen compound	GO:0071417	1	21	5	18883	0.00554879	0.027854900000000002	P27695
negative regulation of apoptotic process in bone marrow cell	GO:0071866	1	21	5	18883	0.00554879	0.027854900000000002	P10809
SRP-dependent cotranslational protein targeting to membrane	GO:0006614	2	21	89	18883	0.00435177	0.0295214	P08708,P61247
fusion of virus membrane with host plasma membrane	GO:0019064	1	21	7	18883	0.00776008	0.030434100000000002	P62937
negative regulation of fatty acid oxidation	GO:0046322	1	21	7	18883	0.00776008	0.030434100000000002	O00763
epidermis morphogenesis	GO:0048730	1	21	7	18883	0.00776008	0.030434100000000002	Q5D862
nuclear-transcribed mRNA catabolic process, nonsense-mediated decay	GO:0000184	2	21	117	18883	0.00740139	0.030454900000000003	P08708,P61247
negative regulation of protein kinase activity by regulation of protein phosphorylation	GO:0044387	1	21	8	18883	0.00886397	0.031336	P06748
ribosome assembly	GO:0042255	1	21	8	18883	0.00886397	0.031336	P06748
ribosomal large subunit export from nucleus	GO:0000055	1	21	8	18883	0.00886397	0.031336	P06748
establishment of integrated proviral latency	GO:0075713	1	21	8	18883	0.00886397	0.031336	P62937
anterograde axonal protein transport	GO:0099641	1	21	8	18883	0.00886397	0.031336	P04792
establishment of Golgi localization	GO:0051683	1	21	8	18883	0.00886397	0.031336	P63104
viral transcription	GO:0019083	2	21	109	18883	0.00645416	0.0317646	P08708,P61247
response to organic cyclic compound	GO:0014070	2	21	125	18883	0.008407799999999998	0.032467	P10809,O00763
biotin metabolic process	GO:0006768	1	21	9	18883	0.0099667	0.033806	Q96RQ3
RNA-dependent DNA biosynthetic process	GO:0006278	1	21	9	18883	0.0099667	0.033806	P62937
fructose 1,6-bisphosphate metabolic process	GO:0030388	1	21	9	18883	0.0099667	0.033806	P04075
IRES-dependent viral translational initiation	GO:0075522	1	21	10	18883	0.0110682	0.034297900000000006	Q14152
regulation of cell death	GO:0010941	1	21	10	18883	0.0110682	0.034297900000000006	P63104
positive regulation of endothelial cell chemotaxis	GO:2001028	1	21	10	18883	0.0110682	0.034297900000000006	P04792
histone exchange	GO:0043486	1	21	10	18883	0.0110682	0.034297900000000006	P06454
fructose metabolic process	GO:0006000	1	21	10	18883	0.0110682	0.034297900000000006	P04075
regulation of centriole replication	GO:0046599	1	21	10	18883	0.0110682	0.034297900000000006	P06748
erythrocyte homeostasis	GO:0034101	1	21	10	18883	0.0110682	0.034297900000000006	P08708
tube formation	GO:0035148	1	21	11	18883	0.0121686	0.0367991	P63104
carnitine shuttle	GO:0006853	1	21	11	18883	0.0121686	0.0367991	O00763
cellular response to interleukin-7	GO:0098761	1	21	12	18883	0.013267900000000001	0.0391792	P10809
virion assembly	GO:0019068	1	21	12	18883	0.013267900000000001	0.0391792	P62937
synapse maturation	GO:0060074	1	21	13	18883	0.0143659	0.039624599999999996	P07737
negative regulation of oxidative stress-induced intrinsic apoptotic signaling pathway	GO:1902176	1	21	13	18883	0.0143659	0.039624599999999996	P04792
positive regulation of actin filament bundle assembly	GO:0032233	1	21	13	18883	0.0143659	0.039624599999999996	P07737
positive regulation of lipid storage	GO:0010884	1	21	13	18883	0.0143659	0.039624599999999996	O00763
negative regulation of smooth muscle cell migration	GO:0014912	1	21	13	18883	0.0143659	0.039624599999999996	P27695
pentose-phosphate shunt	GO:0006098	1	21	13	18883	0.0143659	0.039624599999999996	P29401
respiratory system process	GO:0003016	1	21	14	18883	0.015462799999999999	0.0421865	P63104
protein folding	GO:0006457	2	21	175	18883	0.015975899999999998	0.0431176	P62937,P10809
positive regulation of ruffle assembly	GO:1900029	1	21	15	18883	0.0165585	0.044214800000000005	P07737
striated muscle contraction	GO:0006941	1	21	16	18883	0.017653099999999998	0.046641300000000004	P04075
negative regulation of reactive oxygen species biosynthetic process	GO:1903427	1	21	17	18883	0.0187465	0.048509	P10809
negative regulation of lipid catabolic process	GO:0050995	1	21	17	18883	0.0187465	0.048509	O00763

## Sheet: HCT CC
term	annotation	term_genes_found	input_size	term_genes	genes_universe	hyp_pval	hyp_pval_adj	genes
focal adhesion	GO:0005925	7	21	418	19614	1.70585e-07	1.55233e-05	P63104,P08708,P61247,P62937,P07737,P06748,P04792
cytosol	GO:0005829	16	21	5175	19614	2.66711e-06	0.00012135299999999999	Q99613,Q14152,P63104,P29401,P08708,P61247,P06454,P62937,P07737,P06748,P10809,P04792,O00763,P04075,Q02413,Q96RQ3
keratohyalin granule	GO:0036457	2	21	4	19614	6.54228e-06	0.000198449	Q5D862,Q86YZ3
cornified envelope	GO:0001533	3	21	45	19614	1.4581199999999999e-05	0.000331723	Q5D862,Q86YZ3,Q02413
eukaryotic 43S preinitiation complex	GO:0016282	2	21	17	19614	0.000147052	0.00191167	Q99613,Q14152
eukaryotic translation initiation factor 3 complex	GO:0005852	2	21	16	19614	0.000129835	0.00196917	Q99613,Q14152
eukaryotic 48S preinitiation complex	GO:0033290	2	21	15	19614	0.000113679	0.00206896	Q99613,Q14152
extracellular exosome	GO:0070062	9	21	2170	19614	0.00020699	0.00235451	P63104,P29401,P61247,P62937,P07737,P10809,P04792,Q86YZ3,P04075
nucleus	GO:0005634	15	21	6594	19614	0.000446198	0.00451155	Q14498,Q14152,P63104,P61247,P06454,P62937,P07737,P06748,P27695,P04792,O00763,Q5D862,Q86YZ3,P04075,Q9Y383
nuclear speck	GO:0016607	4	21	404	19614	0.0008038339999999999	0.00731489	Q14498,P29401,P27695,Q9Y383
vesicle	GO:0031982	3	21	183	19614	0.000938895	0.00776722	P63104,P29401,P62937
cytosolic small ribosomal subunit	GO:0022627	2	21	47	19614	0.00114644	0.00869382	P08708,P61247
methylcrotonoyl-CoA carboxylase complex	GO:1905202	1	21	2	19614	0.00214024	0.010820100000000001	Q96RQ3
multi-eIF complex	GO:0043614	1	21	2	19614	0.00214024	0.010820100000000001	Q14152
eukaryotic translation initiation factor 3 complex, eIF3e	GO:0071540	1	21	2	19614	0.00214024	0.010820100000000001	Q14152
3-methylcrotonyl-CoA carboxylase complex, mitochondrial	GO:0002169	1	21	2	19614	0.00214024	0.010820100000000001	Q96RQ3
tertiary granule lumen	GO:1904724	2	21	55	19614	0.00156679	0.0109675	Q5D862,P04075
ribosome	GO:0005840	3	21	237	19614	0.0019725000000000003	0.012821200000000001	P08708,P61247,P27695
nucleoplasm	GO:0005654	10	21	3719	19614	0.00268686	0.012868600000000001	Q14498,Q14152,P63104,P29401,P08708,P61247,P06454,P06748,P27695,Q9Y383
zymogen granule	GO:0042588	1	21	4	19614	0.00427611	0.0185298	P10809
coated vesicle	GO:0030135	1	21	4	19614	0.00427611	0.0185298	P10809
lipopolysaccharide receptor complex	GO:0046696	1	21	5	19614	0.00534241	0.0220982	P10809
secretory granule lumen	GO:0034774	2	21	115	19614	0.006654	0.026326699999999998	P62937,P04075
ficolin-1-rich granule lumen	GO:1904813	2	21	124	19614	0.00769652	0.026937799999999998	P62937,P04075
eukaryotic translation initiation factor 3 complex, eIF3m	GO:0071541	1	21	7	19614	0.00747176	0.027197199999999998	Q14152
protein-containing complex	GO:0032991	4	21	745	19614	0.00737603	0.027967400000000003	Q14498,P62937,P06748,P10809
mitochondrial crista	GO:0030061	1	21	8	19614	0.0085348	0.0287654	P10809
sperm head	GO:0061827	1	21	9	19614	0.00959676	0.0311895	P04075
blood microparticle	GO:0072562	2	21	143	19614	0.0101226	0.031764	P63104,P07737
cytoplasm	GO:0005737	13	21	6873	19614	0.0108443	0.032894400000000004	Q99613,Q14152,P63104,P61247,P62937,P07737,P06748,P27695,P10809,P04792,Q5D862,Q86YZ3,P04075
ribonucleoprotein complex	GO:1990904	2	21	160	19614	0.0125443	0.0368235	P61247,P06748
spindle pole centrosome	GO:0031616	1	21	17	19614	0.0180535	0.04831969999999999	P06748
U2-type prespliceosome	GO:0071004	1	21	17	19614	0.0180535	0.04831969999999999	Q9Y383
contractile fiber	GO:0043292	1	21	16	19614	0.0170002	0.04834430000000001	P04792

## Sheet: HCT MF
term	annotation	term_genes_found	input_size	term_genes	genes_universe	hyp_pval	hyp_pval_adj	genes
RNA binding	GO:0003723	14	21	1531	18483	4.51195e-11	4.82779e-09	Q14498,Q99613,Q14152,P63104,P08708,P61247,P62937,P07737,P06748,P27695,P10809,P04792,P04075,Q9Y383
biotin binding	GO:0009374	2	21	5	18483	1.22697e-05	0.00065643	O00763,Q96RQ3
unfolded protein binding	GO:0051082	3	21	115	18483	0.000287575	0.00769264	P62937,P06748,P10809
transition metal ion binding	GO:0046914	2	21	22	18483	0.000280148	0.00999194	Q5D862,Q86YZ3
NF-kappaB binding	GO:0051059	2	21	32	18483	0.000597424	0.012784899999999998	P06748,P27695
activating transcription factor binding	GO:0033613	2	21	39	18483	0.000888255	0.0158406	P06454,P06748
CoA carboxylase activity	GO:0016421	1	21	2	18483	0.00227113	0.017357900000000002	Q96RQ3
double-stranded DNA 3'-5' exodeoxyribonuclease activity	GO:0008311	1	21	2	18483	0.00227113	0.017357900000000002	P27695
site-specific endodeoxyribonuclease activity, specific for altered base	GO:0016890	1	21	2	18483	0.00227113	0.017357900000000002	P27695
double-stranded DNA exodeoxyribonuclease activity	GO:0008309	1	21	2	18483	0.00227113	0.017357900000000002	P27695
acetyl-CoA carboxylase activity	GO:0003989	1	21	2	18483	0.00227113	0.017357900000000002	O00763
methylcrotonoyl-CoA carboxylase activity	GO:0004485	1	21	2	18483	0.00227113	0.017357900000000002	Q96RQ3
biotin carboxylase activity	GO:0004075	1	21	1	18483	0.00113618	0.0173673	Q96RQ3
transketolase activity	GO:0004802	1	21	3	18483	0.00340485	0.0214305	P29401
fructose-bisphosphate aldolase activity	GO:0004332	1	21	3	18483	0.00340485	0.0214305	P04075
protein kinase C inhibitor activity	GO:0008426	1	21	3	18483	0.00340485	0.0214305	P04792
modification-dependent protein binding	GO:0140030	1	21	4	18483	0.00453734	0.0255524	P10809
uracil DNA N-glycosylase activity	GO:0004844	1	21	4	18483	0.00453734	0.0255524	P27695
fructose binding	GO:0070061	1	21	5	18483	0.00566861	0.027570099999999997	P04075
apolipoprotein A-I binding	GO:0034186	1	21	5	18483	0.00566861	0.027570099999999997	P10809
translation initiation factor activity	GO:0003743	2	21	60	18483	0.00209148	0.027973500000000002	Q99613,Q14152
cadherin binding	GO:0045296	3	21	316	18483	0.00523964	0.028032099999999997	P63104,P07737,P04075
insulin binding	GO:0043559	1	21	6	18483	0.00679866	0.030310700000000003	P10809
phosphodiesterase I activity	GO:0004528	1	21	6	18483	0.00679866	0.030310700000000003	P27695
RNA polymerase II-specific DNA-binding transcription factor binding	GO:0061629	1	21	7	18483	0.00792748	0.0326246	P04792
calcium ion binding	GO:0005509	4	21	715	18483	0.00785865	0.033635000000000005	P29401,Q5D862,Q86YZ3,Q02413
thiamine pyrophosphate binding	GO:0030976	1	21	8	18483	0.00905508	0.034603300000000004	P29401
adenyl-nucleotide exchange factor activity	GO:0000774	1	21	8	18483	0.00905508	0.034603300000000004	P07737
class I DNA-(apurinic or apyrimidinic site) endonuclease activity	GO:0140078	1	21	9	18483	0.0101815	0.035142400000000004	P27695
double-stranded telomeric DNA binding	GO:0003691	1	21	9	18483	0.0101815	0.035142400000000004	P27695
ligase activity	GO:0016874	2	21	139	18483	0.0107381	0.0359055	O00763,Q96RQ3
isomerase activity	GO:0016853	2	21	133	18483	0.00986811	0.0364099	P62937,P10809
Tat protein binding	GO:0030957	1	21	10	18483	0.0113066	0.0366608	P06748
RNA-DNA hybrid ribonuclease activity	GO:0004523	1	21	11	18483	0.0124306	0.038002	P27695
endodeoxyribonuclease activity	GO:0004520	1	21	11	18483	0.0124306	0.038002	P27695
DNA-(apurinic or apyrimidinic site) endonuclease activity	GO:0003906	1	21	12	18483	0.013553299999999999	0.038163199999999994	P27695
gamma-catenin binding	GO:0045295	1	21	12	18483	0.013553299999999999	0.038163199999999994	Q02413
toxic substance binding	GO:0015643	1	21	12	18483	0.013553299999999999	0.038163199999999994	Q02413
ribosomal large subunit binding	GO:0043023	1	21	13	18483	0.014674799999999998	0.0392551	P06748
virion binding	GO:0046790	1	21	13	18483	0.014674799999999998	0.0392551	P62937
histone binding	GO:0042393	2	21	169	18483	0.0155725	0.039672900000000004	P06454,P06748
lyase activity	GO:0016829	2	21	167	18483	0.015225799999999998	0.0397355	P27695,P04075
protein kinase binding	GO:0019901	3	21	480	18483	0.0163495	0.0406836	P63104,P06748,P04792
ribosomal small subunit binding	GO:0043024	1	21	17	18483	0.0191487	0.0435938	P06748
structural molecule activity	GO:0005198	2	21	187	18483	0.0188453	0.0438358	Q14152,Q5D862
high-density lipoprotein particle binding	GO:0008035	1	21	16	18483	0.018032	0.043850599999999997	P10809
catalytic activity	GO:0003824	3	21	506	18483	0.0188	0.044702099999999995	P29401,O00763,P04075
apolipoprotein binding	GO:0034185	1	21	18	18483	0.0202641	0.0451721	P10809
proline-rich region binding	GO:0070064	1	21	19	18483	0.021378400000000002	0.0466834	P07737
structural constituent of ribosome	GO:0003735	2	21	203	18483	0.0219774	0.0470315	P08708,P61247
3'-5' exonuclease activity	GO:0008408	1	21	21	18483	0.0236032	0.0485682	P27695
core promoter sequence-specific DNA binding	GO:0001046	1	21	21	18483	0.0236032	0.0485682	P06748

## Sheet: HEK BP
term	annotation	term_genes_found	input_size	term_genes	genes_universe	hyp_pval	hyp_pval_adj	genes
translational initiation	GO:0006413	16	59	147	18883	6.497770000000001e-21	3.69723e-18	O75821,O15371,Q99613,Q14152,P62273,P39019,P62269,P08708,P62277,P46782,P61247,P62891,P61513,P62750,P32969,P60842
translation	GO:0006412	18	59	315	18883	2.15035e-18	6.11774e-16	P63244,O75821,O15371,Q99613,Q14152,P49411,P62273,P39019,P62269,P08708,P62277,P46782,P61247,P62891,P61513,P62750,P32969,P60842
SRP-dependent cotranslational protein targeting to membrane	GO:0006614	11	59	89	18883	3.13296e-15	5.94219e-13	P62273,P39019,P62269,P08708,P62277,P46782,P61247,P62891,P61513,P62750,P32969
viral transcription	GO:0019083	11	59	109	18883	3.1412099999999996e-14	4.4683699999999995e-12	P62273,P39019,P62269,P08708,P62277,P46782,P61247,P62891,P61513,P62750,P32969
nuclear-transcribed mRNA catabolic process, nonsense-mediated decay	GO:0000184	11	59	117	18883	6.971030000000001e-14	7.93303e-12	P62273,P39019,P62269,P08708,P62277,P46782,P61247,P62891,P61513,P62750,P32969
cytoplasmic translational initiation	GO:0002183	5	59	17	18883	1.50555e-09	1.42776e-07	O75821,O15371,Q99613,Q14152,P60842
formation of cytoplasmic translation initiation complex	GO:0001732	4	59	16	18883	1.52094e-07	1.23631e-05	O75821,O15371,Q99613,Q14152
viral process	GO:0016032	12	59	577	18883	1.78425e-07	1.26905e-05	P63244,O15371,Q14152,P49411,P06748,P10809,P07900,P09651,P09429,P16104,P60842,Q08211
viral translational termination-reinitiation	GO:0075525	3	59	5	18883	2.88454e-07	1.82367e-05	O75821,O15371,Q14152
neutrophil degranulation	GO:0043312	9	59	484	18883	1.78428e-05	0.00101525	P53396,P14923,P07900,P09429,Q5D862,Q86YZ3,P04075,P15924,Q02413
ribosomal small subunit biogenesis	GO:0042274	3	59	21	18883	3.70228e-05	0.00191509	P39019,P08708,P06748
bundle of His cell-Purkinje myocyte adhesion involved in cell communication	GO:0086073	2	59	6	18883	0.000142808	0.0054172	P14923,P15924
L-serine metabolic process	GO:0006563	2	59	6	18883	0.000142808	0.0054172	O43175,P34897
positive regulation of cellular metabolic process	GO:0031325	2	59	6	18883	0.000142808	0.0054172	P53396,O00763
positive regulation of mRNA binding	GO:1902416	2	59	6	18883	0.000142808	0.0054172	O15371,Q99613
glycine metabolic process	GO:0006544	2	59	7	18883	0.00019953	0.00709577	O43175,P34897
positive regulation of cytoplasmic translation	GO:2000767	2	59	8	18883	0.000265505	0.00719391	P16989,Q08211
oxaloacetate metabolic process	GO:0006107	2	59	8	18883	0.000265505	0.00719391	P53396,P40925
L-serine biosynthetic process	GO:0006564	2	59	8	18883	0.000265505	0.00719391	O43175,P34897
response to cold	GO:0009409	3	59	38	18883	0.00022613	0.00756869	P16989,P10809,P07900
DNA recombination	GO:0006310	4	59	104	18883	0.000313127	0.00774648	Q9Y265,P27695,P09429,P16104
antiviral innate immune response	GO:0140374	2	59	9	18883	0.00034067699999999995	0.00775381	Q99623,Q9NVI7
	GO:1902741	2	59	9	18883	0.00034067699999999995	0.00775381	P09429,Q08211
cytoplasmic translation	GO:0002181	3	59	42	18883	0.000305007	0.00788858	P62273,P62891,P32969
gluconeogenesis	GO:0006094	3	59	45	18883	0.000374508	0.00819596	P40925,P04075,P06733
	GO:2000778	3	59	40	18883	0.000263664	0.00833471	P10809,P09429,Q08211
IRES-dependent viral translational initiation	GO:0075522	2	59	10	18883	0.00042499	0.00895628	O15371,Q14152
regulation of ventricular cardiac muscle cell action potential	GO:0098911	2	59	11	18883	0.0005183890000000001	0.0105344	P14923,P15924
cellular response to interleukin-7	GO:0098761	2	59	12	18883	0.000620817	0.0121809	P31948,P10809
protein homotetramerization	GO:0051289	3	59	59	18883	0.0008317880000000001	0.0157762	P34897,O00763,P04075
ribosomal small subunit assembly	GO:0000028	2	59	17	18883	0.00126647	0.0232459	P39019,P46782
alternative mRNA splicing, via spliceosome	GO:0000380	2	59	18	18883	0.00142192	0.0245174	P52272,Q08211
carboxylic acid metabolic process	GO:0019752	2	59	18	18883	0.00142192	0.0245174	P40925,P07195
protein refolding	GO:0042026	2	59	20	18883	0.00175871	0.0294325	P10809,P07900
positive regulation of interferon-alpha production	GO:0032727	2	59	21	18883	0.00193994	0.0306618	P10809,Q08211
chaperone-mediated protein complex assembly	GO:0051131	2	59	21	18883	0.00193994	0.0306618	P10809,P07900
positive regulation of tumor necrosis factor secretion	GO:1904469	2	59	27	18883	0.00320369	0.0314293	P10809,Q08211
canonical glycolysis	GO:0061621	2	59	27	18883	0.00320369	0.0314293	P04075,P06733
DNA-templated viral transcription	GO:0039695	1	59	1	18883	0.0031245	0.031747199999999996	Q08211
regulation of mRNA stability involved in cellular response to UV	GO:1902629	1	59	1	18883	0.0031245	0.031747199999999996	P06748
regulation of endoribonuclease activity	GO:0060699	1	59	1	18883	0.0031245	0.031747199999999996	P06748
positive regulation of viral translation	GO:1904973	1	59	1	18883	0.0031245	0.031747199999999996	Q08211
telomere maintenance via base-excision repair	GO:0097698	1	59	1	18883	0.0031245	0.031747199999999996	P27695
small RNA loading onto RISC	GO:0070922	1	59	1	18883	0.0031245	0.031747199999999996	Q08211
regulation of eIF2 alpha phosphorylation by dsRNA	GO:0060735	1	59	1	18883	0.0031245	0.031747199999999996	P06748
regulation of T cell mediated immune response to tumor cell	GO:0002840	1	59	1	18883	0.0031245	0.031747199999999996	P09429
regulation of restriction endodeoxyribonuclease activity	GO:0032072	1	59	1	18883	0.0031245	0.031747199999999996	P09429
isotype switching to IgG isotypes	GO:0048291	1	59	1	18883	0.0031245	0.031747199999999996	P10809
B cell cytokine production	GO:0002368	1	59	1	18883	0.0031245	0.031747199999999996	P10809
mitochondrial unfolded protein response	GO:0034514	1	59	1	18883	0.0031245	0.031747199999999996	P10809
positive regulation of polysome binding	GO:1905698	1	59	1	18883	0.0031245	0.031747199999999996	Q08211
positive regulation of muscle contraction	GO:0045933	1	59	1	18883	0.0031245	0.031747199999999996	P06733
negative regulation of protein polymerization	GO:0032272	1	59	1	18883	0.0031245	0.031747199999999996	P45880
positive regulation of translation	GO:0045727	3	59	81	18883	0.00207939	0.0319777	O15371,Q99613,P06748
keratinization	GO:0031424	4	59	199	18883	0.00346519	0.0328615	P14923,Q86YZ3,P15924,Q02413
ATP biosynthetic process	GO:0006754	2	59	28	18883	0.00344322	0.03320669999999999	P48047,P04075
positive regulation of DNA replication	GO:0045740	2	59	30	18883	0.0039466	0.03681330000000001	Q08211,Q9HB71
establishment of skin barrier	GO:0061436	2	59	25	18883	0.0027492	0.0401101	Q5D862,Q86YZ3
positive regulation of innate immune response	GO:0045089	2	59	25	18883	0.0027492	0.0401101	P09429,Q08211
positive regulation of DNA repair	GO:0045739	2	59	32	18883	0.00448204	0.040480699999999994	P16104,Q08211
antimicrobial humoral immune response mediated by antimicrobial peptide	GO:0061844	3	59	106	18883	0.00444964	0.040836199999999996	P39019,P62891,P81605
protein stabilization	GO:0050821	4	59	191	18883	0.00299163	0.0415179	Q99623,P10809,P07900,Q02413
negative regulation of RNA polymerase II transcription preinitiation complex assembly	GO:0017055	1	59	2	18883	0.00623941	0.0417673	P09429
cellular response to tetrahydrofolate	GO:1904482	1	59	2	18883	0.00623941	0.0417673	P34897
glycine biosynthetic process from serine	GO:0019264	1	59	2	18883	0.00623941	0.0417673	P34897
regulation of endodeoxyribonuclease activity	GO:0032071	1	59	2	18883	0.00623941	0.0417673	P06748
rRNA export from nucleus	GO:0006407	1	59	2	18883	0.00623941	0.0417673	P06748
positive regulation of respiratory burst involved in inflammatory response	GO:0060265	1	59	2	18883	0.00623941	0.0417673	P39019
base-excision repair, base-free sugar-phosphate removal	GO:0006286	1	59	2	18883	0.00623941	0.0417673	P27695
glycine biosynthetic process	GO:0006545	1	59	2	18883	0.00623941	0.0417673	P34897
regulation of mRNA stability involved in response to oxidative stress	GO:2000815	1	59	2	18883	0.00623941	0.0417673	P52272
regulation of cytoplasmic translation	GO:2000765	1	59	2	18883	0.00623941	0.0417673	Q08211
induction by virus of host autophagy	GO:0039520	1	59	2	18883	0.00623941	0.0417673	Q99623
cap-dependent translational initiation	GO:0002191	1	59	2	18883	0.00623941	0.0417673	O15371
regulation of tolerance induction	GO:0002643	1	59	2	18883	0.00623941	0.0417673	P09429
positive regulation of T cell mediated immune response to tumor cell	GO:0002842	1	59	2	18883	0.00623941	0.0417673	P10809
negative regulation of apoptotic cell clearance	GO:2000426	1	59	2	18883	0.00623941	0.0417673	P09429
malonyl-CoA biosynthetic process	GO:2001295	1	59	2	18883	0.00623941	0.0417673	O00763
regulation of cardiolipin metabolic process	GO:1900208	1	59	2	18883	0.00623941	0.0417673	Q99623
positive regulation of interleukin-6 production	GO:0032755	3	59	92	18883	0.00298721	0.042493	P10809,P09429,Q08211
binding of sperm to zona pellucida	GO:0007339	2	59	39	18883	0.00660285	0.0426934	P45880,P04075
positive regulation of interleukin-10 production	GO:0032733	2	59	39	18883	0.00660285	0.0426934	P10809,P09429
regulation of heart rate by cardiac conduction	GO:0086091	2	59	39	18883	0.00660285	0.0426934	P14923,P15924
chromatin remodeling	GO:0006338	3	59	110	18883	0.00493419	0.043868	Q9Y265,P06748,P09429
negative regulation of apoptotic process	GO:0043066	6	59	547	18883	0.00706441	0.0446628	Q99623,P16989,P61247,P06748,P10809,Q9NVI7
DNA repair	GO:0006281	5	59	386	18883	0.00705203	0.0450855	Q9Y265,P06748,P27695,P09429,P16104
cornification	GO:0070268	3	59	113	18883	0.00531772	0.0465505	P14923,P15924,Q02413
glycolytic process	GO:0006096	2	59	36	18883	0.00564753	0.0472565	P04075,P06733
positive regulation of interleukin-12 production	GO:0032735	2	59	36	18883	0.00564753	0.0472565	P10809,P09429
B cell activation	GO:0042113	2	59	36	18883	0.00564753	0.0472565	Q99623,P10809
CENP-A containing nucleosome assembly	GO:0034080	2	59	43	18883	0.00798234	0.0499115	Q9Y265,P06748

## Sheet: HEK CC
term	annotation	term_genes_found	input_size	term_genes	genes_universe	hyp_pval	hyp_pval_adj	genes
extracellular exosome	GO:0070062	31	59	2170	19614	4.58959e-15	8.39895e-13	O43175,P63244,Q9Y265,P49411,P34897,P62273,P39019,P62269,P62277,P46782,P61247,P61513,P62750,P53396,P52272,P60660,P40925,P07195,P14923,P10809,P07900,P09651,P16104,Q86YZ3,P04075,P81605,P06733,P60842,Q7Z406,P15924,Q9HB71
ribosome	GO:0005840	13	59	237	19614	2.0829000000000001e-13	1.90585e-11	P63244,P62273,P39019,P62269,P08708,P62277,P46782,P61247,P62891,P61513,P62750,P32969,P27695
cytosolic small ribosomal subunit	GO:0022627	8	59	47	19614	1.1743799999999999e-12	7.16374e-11	P63244,P62273,P39019,P62269,P08708,P62277,P46782,P61247
cytosol	GO:0005829	40	59	5175	19614	3.27903e-11	1.50015e-09	O43175,P31948,P63244,Q9NR30,O75821,O15371,Q99613,Q14152,Q9Y265,P16989,P34897,P62273,P39019,P62269,P08708,P62277,P46782,P61247,P62891,P61513,P62750,P32969,P06748,P53396,P60660,P40925,P07195,P14923,P10809,P07900,O00763,P04075,P06733,P60842,Q7Z406,Q02413,Q08211,Q96RQ3,Q9H3U1,Q9HB71
focal adhesion	GO:0005925	11	59	418	19614	4.03267e-08	1.47596e-06	P62273,P39019,P62269,P08708,P62277,P46782,P61247,P61513,P32969,P06748,P14923
eukaryotic 48S preinitiation complex	GO:0033290	4	59	15	19614	9.8314e-08	2.99858e-06	O75821,O15371,Q99613,Q14152
eukaryotic translation initiation factor 3 complex	GO:0005852	4	59	16	19614	1.30791e-07	3.4192599999999998e-06	O75821,O15371,Q99613,Q14152
eukaryotic 43S preinitiation complex	GO:0016282	4	59	17	19614	1.70651e-07	3.90365e-06	O75821,O15371,Q99613,Q14152
mitochondrial nucleoid	GO:0042645	5	59	44	19614	2.0560400000000002e-07	4.18062e-06	P45880,P49411,P34897,P55084,Q9NVI7
cornified envelope	GO:0001533	5	59	45	19614	2.30774e-07	4.223169999999999e-06	P14923,Q5D862,Q86YZ3,P15924,Q02413
nucleus	GO:0005634	39	59	6594	19614	3.3839500000000003e-07	5.62967e-06	Q99623,P31948,P63244,Q14498,Q9NR30,O75821,Q14152,Q9Y265,P16989,P45880,P34897,P39019,P62269,P62277,P61247,P61513,P62750,P32969,P48047,P06748,P52272,P14923,P27695,P07900,O00763,P09651,P09429,P16104,Q5D862,Q86YZ3,P04075,P06733,P50402,P60842,P15924,Q08211,Q9H3U1,Q9Y383,Q9HB71
ribonucleoprotein complex	GO:1990904	7	59	160	19614	5.0354e-07	7.678989999999998e-06	Q9Y265,P46782,P61247,P06748,P52272,P09651,Q08211
small ribosomal subunit	GO:0015935	4	59	29	19614	1.6577500000000001e-06	2.3335999999999998e-05	P63244,P62273,P62269,P46782
cytoplasm	GO:0005737	38	59	6873	19614	4.022369999999999e-06	5.2578100000000004e-05	Q99623,P31948,P63244,Q9NR30,O75821,O15371,Q99613,Q14152,Q9Y265,P16989,P34897,P62273,P39019,P62269,P61247,P62750,P06748,P53396,P52272,P40925,P07195,P14923,P27695,P10809,P07900,P09651,P09429,Q5D862,Q86YZ3,P04075,P06733,P50402,P60842,Q7Z406,P15924,Q08211,Q9H3U1,Q9HB71
cytosolic large ribosomal subunit	GO:0022625	4	59	59	19614	2.97005e-05	0.000362346	P62891,P61513,P62750,P32969
ficolin-1-rich granule lumen	GO:1904813	5	59	124	19614	3.54811e-05	0.000405815	P53396,P14923,P07900,P09429,P04075
keratohyalin granule	GO:0036457	2	59	4	19614	5.31663e-05	0.00057232	Q5D862,Q86YZ3
desmosome	GO:0030057	3	59	26	19614	6.39889e-05	0.000650554	P14923,P15924,Q02413
nucleoplasm	GO:0005654	24	59	3719	19614	9.17967e-05	0.000884147	P63244,Q14498,Q9NR30,Q14152,Q9Y265,P62273,P39019,P62269,P08708,P62277,P46782,P61247,P06748,P53396,P52272,P27695,P07900,P09651,P09429,P16104,P50402,Q08211,Q9Y383,Q9HB71
polysomal ribosome	GO:0042788	3	59	34	19614	0.000144775	0.0013247	P62273,P62891,Q08211
mitochondrion	GO:0005739	14	59	1553	19614	0.000160486	0.00139852	Q99623,P63244,Q9NR30,P45880,P49411,P34897,P48047,P27695,P10809,P07900,O00763,P55084,Q96RQ3,Q9NVI7
eukaryotic translation initiation factor 3 complex, eIF3m	GO:0071541	2	59	7	19614	0.000185003	0.00153889	O15371,Q14152
fascia adherens	GO:0005916	2	59	10	19614	0.00039413800000000004	0.00300531	P14923,P15924
membrane	GO:0016020	37	59	7884	19614	0.00038966300000000005	0.00310036	Q99623,P63244,Q9NR30,O15371,Q14152,Q9Y265,P45880,P49411,P34897,P39019,P62269,P08708,P62277,P46782,P04844,P32969,P48047,P06748,P53396,P52272,P60660,P07195,P14923,P10809,P07900,P09651,P09429,P55084,P04075,P06733,P50402,P60842,Q7Z406,P15924,Q02413,Q08211,Q9NVI7
rough endoplasmic reticulum	GO:0005791	3	59	67	19614	0.00108021	0.00790715	P62273,P04844,P10809
spindle pole centrosome	GO:0031616	2	59	17	19614	0.00117515	0.00827123	P06748,P50402
postsynaptic density	GO:0014069	5	59	282	19614	0.001575	0.010675	Q99623,Q14152,P39019,P62269,P62277
mitochondrial outer membrane	GO:0005741	4	59	182	19614	0.00219318	0.014334	Q99623,P45880,O00763,P55084
mitochondrial inner membrane	GO:0005743	6	59	454	19614	0.00237779	0.0150047	Q99623,P34897,P48047,P10809,P55084,Q9NVI7
M band	GO:0031430	2	59	26	19614	0.00275985	0.0168351	P04075,P06733
gamma-catenin-TCF7L2 complex	GO:0071665	1	59	1	19614	0.00300806	0.0177572	P14923
nuclear matrix	GO:0016363	3	59	109	19614	0.00432968	0.024760400000000002	Q99623,Q9Y265,P52272
IRE1-RACK1-PP2A complex	GO:1990630	1	59	2	19614	0.00600722	0.027482999999999997	P63244
mitochondrial prohibitin complex	GO:0035632	1	59	2	19614	0.00600722	0.027482999999999997	Q99623
multi-eIF complex	GO:0043614	1	59	2	19614	0.00600722	0.027482999999999997	Q14152
3-methylcrotonyl-CoA carboxylase complex, mitochondrial	GO:0002169	1	59	2	19614	0.00600722	0.027482999999999997	Q96RQ3
eukaryotic translation initiation factor 3 complex, eIF3e	GO:0071540	1	59	2	19614	0.00600722	0.027482999999999997	Q14152
methylcrotonoyl-CoA carboxylase complex	GO:1905202	1	59	2	19614	0.00600722	0.027482999999999997	Q96RQ3
secretory granule lumen	GO:0034774	3	59	115	19614	0.00502784	0.027881700000000002	P07900,P09429,P04075
nucleolus	GO:0005730	10	59	1360	19614	0.00690729	0.0300961	Q9NR30,Q14152,P39019,P62277,P61247,P62750,P06748,P52272,P27695,Q08211
protein-containing complex	GO:0032991	7	59	745	19614	0.00680505	0.0303738	Q99623,P31948,Q14498,P06748,P10809,P07900,Q08211
nuclear speck	GO:0016607	5	59	404	19614	0.00727985	0.0309817	Q14498,P27695,P16104,Q9H3U1,Q9Y383
perinuclear region of cytoplasm	GO:0048471	7	59	722	19614	0.00575852	0.030994400000000002	P63244,O75821,P16989,P27695,P07900,Q86YZ3,Q9H3U1
protein-DNA complex	GO:0032993	2	59	45	19614	0.00810482	0.0337087	P06748,P14923
myosin II filament	GO:0097513	1	59	3	19614	0.00899751	0.035794400000000004	Q7Z406
alphav-beta3 integrin-HMGB1 complex	GO:0035868	1	59	3	19614	0.00899751	0.035794400000000004	P09429
intercalated disc	GO:0014704	2	59	49	19614	0.00955382	0.0371989	P14923,P15924
phosphopyruvate hydratase complex	GO:0000015	1	59	4	19614	0.011979	0.041361300000000004	P06733
zymogen granule	GO:0042588	1	59	4	19614	0.011979	0.041361300000000004	P10809
coated vesicle	GO:0030135	1	59	4	19614	0.011979	0.041361300000000004	P10809
tertiary granule lumen	GO:1904724	2	59	55	19614	0.011926	0.043649099999999996	Q5D862,P04075
myosin complex	GO:0016459	2	59	55	19614	0.011926	0.043649099999999996	P60660,Q7Z406
cytoplasmic side of plasma membrane	GO:0009898	2	59	54	19614	0.0115144	0.043898599999999996	P14923,Q02413
BRISC complex	GO:0070552	1	59	5	19614	0.014951599999999999	0.0471748	P34897
lipopolysaccharide receptor complex	GO:0046696	1	59	5	19614	0.014951599999999999	0.0471748	P10809
perichromatin fibrils	GO:0005726	1	59	5	19614	0.014951599999999999	0.0471748	Q08211
R2TP complex	GO:0097255	1	59	5	19614	0.014951599999999999	0.0471748	Q9Y265
ficolin-1-rich granule membrane	GO:0101003	2	59	61	19614	0.014528600000000001	0.0492358	P15924,Q02413
brush border	GO:0005903	2	59	64	19614	0.0159136	0.0493591	P60660,Q7Z406

## Sheet: HEK MF
term	annotation	term_genes_found	input_size	term_genes	genes_universe	hyp_pval	hyp_pval_adj	genes
RNA binding	GO:0003723	35	59	1531	18483	2.8860700000000004e-23	6.6091000000000004e-21	P31948,P63244,Q14498,Q9NR30,O75821,O15371,Q99613,Q14152,P16989,P49411,P39019,P62269,P08708,P62277,P46782,P61247,P62891,P61513,P62750,P32969,P06748,P52272,P27695,P10809,P07900,P09651,P09429,P55084,P04075,P81605,P06733,P60842,P15924,Q08211,Q9Y383
structural constituent of ribosome	GO:0003735	11	59	203	18483	3.77553e-11	4.32299e-09	P62273,P39019,P62269,P08708,P62277,P46782,P61247,P62891,P61513,P62750,P32969
rRNA binding	GO:0019843	5	59	45	18483	3.08835e-07	2.35744e-05	Q9NR30,P62269,P46782,P62750,P32969
translation initiation factor activity	GO:0003743	5	59	60	18483	1.3310299999999998e-06	7.62014e-05	O75821,O15371,Q99613,Q14152,P60842
mRNA binding	GO:0003729	7	59	217	18483	5.6721400000000006e-06	0.000259784	Q14152,P62277,P46782,P52272,P60842,Q08211,Q9Y383
cadherin binding	GO:0045296	8	59	316	18483	6.94377e-06	0.00026502	P63244,Q9Y265,P62750,P14923,P04075,P06733,P50402,Q9H3U1
L-malate dehydrogenase activity	GO:0030060	2	59	4	18483	5.9858e-05	0.00195821	O43175,P40925
cell adhesive protein binding involved in bundle of His cell-Purkinje myocyte communication	GO:0086083	2	59	5	18483	9.95583e-05	0.00207262	P14923,P15924
biotin binding	GO:0009374	2	59	5	18483	9.95583e-05	0.00207262	O00763,Q96RQ3
double-stranded RNA binding	GO:0003725	4	59	72	18483	8.193149999999999e-05	0.0020846999999999997	Q9NR30,P10809,P60842,Q08211
mRNA 5'-UTR binding	GO:0048027	3	59	26	18483	7.623970000000001e-05	0.00218236	P34897,P62277,P61247
lyase activity	GO:0016829	5	59	167	18483	0.00019144599999999998	0.00365344	P53396,P27695,P09429,P04075,P06733
polysome binding	GO:1905538	2	59	7	18483	0.00020821400000000002	0.00366777	P16989,Q08211
protein binding	GO:0005515	52	59	12556	18483	0.000294773	0.00482164	Q99623,P31948,P63244,Q14498,Q9NR30,O75821,O15371,Q99613,Q14152,Q9Y265,P16989,P45880,P49411,P34897,P39019,P62269,P62277,P46782,P61247,P04844,P61513,P62750,P32969,P48047,P06748,P53396,P52272,P60660,P40925,P07195,P14923,P27695,P10809,P07900,O00763,P09651,P09429,P55084,P16104,P04075,P81605,P06733,P50402,P60842,P15924,Q02413,Q08211,Q96RQ3,Q9H3U1,Q9NVI7,Q9Y383,Q9HB71
oxidoreductase activity, acting on the CH-OH group of donors, NAD or NADP as acceptor	GO:0016616	3	59	43	18483	0.00034819	0.00531571	O43175,P40925,P07195
single-stranded DNA binding	GO:0003697	4	59	111	18483	0.000434814	0.0058572	P10809,P09651,P09429,Q08211
transcription coactivator activity	GO:0003713	6	59	306	18483	0.000422688	0.00604972	Q9Y265,P06748,P14923,P27695,P09429,Q08211
ribosome binding	GO:0043022	3	59	55	18483	0.00072036	0.00916458	P63244,Q99613,P04844
ATPase activity	GO:0016887	5	59	237	18483	0.000946876	0.010841700000000001	Q9Y265,P10809,P07900,Q7Z406,Q08211
damaged DNA binding	GO:0003684	3	59	60	18483	0.000929047	0.011197499999999999	P27695,P09429,P16104
catalytic activity	GO:0003824	7	59	506	18483	0.0011015	0.0114657	P34897,P53396,P40925,P07195,O00763,P55084,P04075
helicase activity	GO:0004386	4	59	141	18483	0.00106694	0.011634700000000001	Q9NR30,Q9Y265,P60842,Q08211
protein homodimerization activity	GO:0042803	8	59	686	18483	0.00143984	0.0143357	Q99623,P63244,P34897,P06748,P14923,P07900,P06733,Q9HB71
DNA polymerase binding	GO:0070182	2	59	20	18483	0.00183422	0.0175015	P07900,P09429
RNA helicase activity	GO:0003724	3	59	77	18483	0.00191115	0.0175062	Q9NR30,P60842,Q08211
transition metal ion binding	GO:0046914	2	59	22	18483	0.0022209	0.019561000000000002	Q5D862,Q86YZ3
DNA replication origin binding	GO:0003688	2	59	23	18483	0.00242744	0.020588299999999997	P10809,Q08211
diiodophenylpyruvate reductase activity	GO:0047860	1	59	1	18483	0.00319212	0.021499900000000002	P40925
ATP citrate synthase activity	GO:0003878	1	59	1	18483	0.00319212	0.021499900000000002	P53396
biotin carboxylase activity	GO:0004075	1	59	1	18483	0.00319212	0.021499900000000002	Q96RQ3
3'-5' DNA/RNA helicase activity	GO:0033679	1	59	1	18483	0.00319212	0.021499900000000002	Q08211
phosphoglycerate dehydrogenase activity	GO:0004617	1	59	1	18483	0.00319212	0.021499900000000002	O43175
nucleotide binding	GO:0000166	13	59	1781	18483	0.00350696	0.0229455	Q9NR30,Q9Y265,P45880,P49411,P53396,P10809,P07900,O00763,P60842,Q7Z406,Q08211,Q96RQ3,Q9NVI7
actin-dependent ATPase activity	GO:0030898	2	59	25	18483	0.00286662	0.0234448	P60660,Q7Z406
structural molecule activity	GO:0005198	4	59	187	18483	0.00299279	0.0236327	Q14152,P14923,Q5D862,P15924
regulatory region RNA binding	GO:0001069	1	59	2	18483	0.00637423	0.026066000000000002	Q08211
double-stranded DNA exodeoxyribonuclease activity	GO:0008309	1	59	2	18483	0.00637423	0.026066000000000002	P27695
TORC2 complex binding	GO:1904841	1	59	2	18483	0.00637423	0.026066000000000002	P62750
site-specific endodeoxyribonuclease activity, specific for altered base	GO:0016890	1	59	2	18483	0.00637423	0.026066000000000002	P27695
triplex DNA binding	GO:0045142	1	59	2	18483	0.00637423	0.026066000000000002	Q08211
acetyl-CoA carboxylase activity	GO:0003989	1	59	2	18483	0.00637423	0.026066000000000002	O00763
methylcrotonoyl-CoA carboxylase activity	GO:0004485	1	59	2	18483	0.00637423	0.026066000000000002	Q96RQ3
CoA carboxylase activity	GO:0016421	1	59	2	18483	0.00637423	0.026066000000000002	Q96RQ3
transferase activity, transferring acyl groups, acyl groups converted into alkyl on transfer	GO:0046912	1	59	2	18483	0.00637423	0.026066000000000002	P53396
telomeric repeat-containing RNA binding	GO:0061752	1	59	2	18483	0.00637423	0.026066000000000002	P09651
mRNA cap binding	GO:0098808	1	59	2	18483	0.00637423	0.026066000000000002	O15371
double-stranded DNA 3'-5' exodeoxyribonuclease activity	GO:0008311	1	59	2	18483	0.00637423	0.026066000000000002	P27695
L-allo-threonine aldolase activity	GO:0008732	1	59	2	18483	0.00637423	0.026066000000000002	P34897
glycine hydroxymethyltransferase activity	GO:0004372	1	59	2	18483	0.00637423	0.026066000000000002	P34897
amide binding	GO:0033218	1	59	2	18483	0.00637423	0.026066000000000002	Q99623
nucleic acid binding	GO:0003676	9	59	1002	18483	0.00425578	0.0270715	Q14498,Q9NR30,O75821,P16989,P62269,P52272,P09651,P60842,Q08211
NAD binding	GO:0051287	2	59	39	18483	0.0068807	0.027166900000000004	O43175,P40925
ATP binding	GO:0005524	11	59	1489	18483	0.0068405	0.027482	Q9NR30,Q9Y265,P53396,P10809,P07900,O00763,P60842,Q7Z406,Q08211,Q96RQ3,Q9NVI7
NF-kappaB binding	GO:0051059	2	59	32	18483	0.00467206	0.028916300000000002	P06748,P27695
miRNA binding	GO:0035198	2	59	34	18483	0.00526276	0.0317151	Q9NR30,P09651
lipopolysaccharide binding	GO:0001530	2	59	35	18483	0.00557032	0.0318901	P10809,P09429
GTPase binding	GO:0051020	2	59	35	18483	0.00557032	0.0318901	P07900,P06733
double-stranded DNA binding	GO:0003690	3	59	130	18483	0.00829657	0.032202	P16989,P09429,Q08211
unfolded protein binding	GO:0051082	3	59	115	18483	0.00592183	0.0330756	P06748,P10809,P07900
protein tyrosine kinase inhibitor activity	GO:0030292	1	59	3	18483	0.00954635	0.033122900000000004	P63244
3'-5' RNA helicase activity	GO:0034458	1	59	3	18483	0.00954635	0.033122900000000004	Q08211
fructose-bisphosphate aldolase activity	GO:0004332	1	59	3	18483	0.00954635	0.033122900000000004	P04075
single-stranded 3'-5' DNA helicase activity	GO:1990518	1	59	3	18483	0.00954635	0.033122900000000004	Q08211
acetyl-CoA C-myristoyltransferase activity	GO:0050633	1	59	3	18483	0.00954635	0.033122900000000004	P55084
cytoskeletal protein-membrane anchor activity	GO:0106006	1	59	3	18483	0.00954635	0.033122900000000004	P14923
Hsp90 protein binding	GO:0051879	2	59	44	18483	0.0086951	0.03318630000000001	P31948,Q9H3U1
single-stranded RNA binding	GO:0003727	2	59	50	18483	0.011122700000000001	0.0380163	P09651,Q08211
phosphopyruvate hydratase activity	GO:0004634	1	59	4	18483	0.0127085	0.0382927	P06733
malate dehydrogenase activity	GO:0016615	1	59	4	18483	0.0127085	0.0382927	P40925
malic enzyme activity	GO:0004470	1	59	4	18483	0.0127085	0.0382927	P40925
uracil DNA N-glycosylase activity	GO:0004844	1	59	4	18483	0.0127085	0.0382927	P27695
C-X-C chemokine binding	GO:0019958	1	59	4	18483	0.0127085	0.0382927	P09429
sphingolipid binding	GO:0046625	1	59	4	18483	0.0127085	0.0382927	Q99623
modification-dependent protein binding	GO:0140030	1	59	4	18483	0.0127085	0.0382927	P10809
serine binding	GO:0070905	1	59	4	18483	0.0127085	0.0382927	P34897
RISC complex binding	GO:1905172	1	59	4	18483	0.0127085	0.0382927	Q08211
protein kinase C binding	GO:0005080	2	59	55	18483	0.0133469	0.039693900000000004	P63244,P15924
L-lactate dehydrogenase activity	GO:0004459	1	59	5	18483	0.0158607	0.0432394	P07195
dolichyl-diphosphooligosaccharide-protein glycotransferase activity	GO:0004579	1	59	5	18483	0.0158607	0.0432394	P04844
cobalt ion binding	GO:0050897	1	59	5	18483	0.0158607	0.0432394	P34897
fructose binding	GO:0070061	1	59	5	18483	0.0158607	0.0432394	P04075
apolipoprotein A-I binding	GO:0034186	1	59	5	18483	0.0158607	0.0432394	P10809
porin activity	GO:0015288	1	59	5	18483	0.0158607	0.0432394	P45880
receptor tyrosine kinase binding	GO:0030971	2	59	61	18483	0.0162482	0.0432656	P63244,Q14152
cell adhesion molecule binding	GO:0050839	2	59	61	18483	0.0162482	0.0432656	P14923,P15924
scaffold protein binding	GO:0097110	2	59	60	18483	0.0157475	0.046232999999999996	P07900,P15924
BH3 domain binding	GO:0051434	1	59	6	18483	0.0190031	0.046294800000000004	P63244
supercoiled DNA binding	GO:0097100	1	59	6	18483	0.0190031	0.046294800000000004	P09429
nitric-oxide synthase regulator activity	GO:0030235	1	59	6	18483	0.0190031	0.046294800000000004	P07900
phosphodiesterase I activity	GO:0004528	1	59	6	18483	0.0190031	0.046294800000000004	P27695
insulin binding	GO:0043559	1	59	6	18483	0.0190031	0.046294800000000004	P10809
voltage-gated anion channel activity	GO:0008308	1	59	6	18483	0.0190031	0.046294800000000004	P45880
chromatin DNA binding	GO:0031490	2	59	64	18483	0.017791	0.0468291	P27695,Q08211
DNA helicase activity	GO:0003678	2	59	65	18483	0.0183185	0.047669800000000005	Q9Y265,Q08211
tubulin binding	GO:0015631	2	59	69	18483	0.0204942	0.0494018	P04075,Q9HB71
